# Supplementary material for: 2019 ESC Guidelines for the diagnosis and management of chronic coronary syndromes
Source: Oxford University Press journal article supplement (doi:10.1093/eurheartj/ehz425), 2019-08-31
Supplement: ehz425_supplementary_data.pdf [file ehz425_supplementary_data.pdf]

# 2019 ESC Guidelines on the diagnosis and management of chronic coronary syndromes: supplementary data

## The Task Force for the diagnosis and management of chronic coronary syndromes of the European Society of Cardiology (ESC)

**Authors/Task Force Members: Juhani Knuuti\* (Finland) (Chairperson), William Wijns\* (Ireland) (Chairperson), Antti Saraste (Finland), Davide Capodanno (Italy), Emanuele Barbato (Italy), Christian Funck-Brentano (France), Eva Prescott (Denmark), Robert F. Storey (United Kingdom), Christi Deaton (United Kingdom), Thomas Cuisset (France), Stefan Agewall (Norway), Kenneth Dickstein (Norway), Thor Edvardsen (Denmark), Javier Escaned (Spain), Bernard J. Gersh (United States of America), Pavel Svitol (Czech Republic), Martine Gilard (France), David Hasdai (Israel), Robert Hatala (Slovak Republic), Felix Mahfoud (Germany), Josep Masip (Spain), Claudio Muneretto (Italy), Marco Valgimigli (Switzerland), Stephan Achenbach (Germany), Jeroen J. Bax (Netherlands)**

**Document Reviewers: Franz-Josef Neumann (Germany) (CPG Review Co-ordinator), Udo Sechtem (Germany) (CPG Review Co-ordinator), Adrian Paul Banning (United Kingdom), Nikolaos Bonaros (Austria), Héctor Bueno (Spain), Raffaele Bugiardini (Italy), Alaide Chieffo (Italy), Filippo Crea (Italy),**

\*Corresponding authors: Juhani Knuuti, Department of Clinical Physiology, Nuclear Medicine and PET and Turku PET Centre, Turku University Hospital, Kiinamyllynkatu 4-8, FI-20520 Turku, Finland. Tel: +358 500 592 998, Email: juhani.knuuti@tyks.fi. William Wijns, The Lambe Institute for Translational Medicine and Curam, National University of Ireland, Galway, University Road, Galway, H91 TK33, Ireland. Tel: +353 91 524411, Email: william.wyns@nuigalway.ie.

**ESC entities having participated in the development of this document:**

**ESC Committee for Practice Guidelines (CPG) and National Cardiac Societies document reviewers: listed in the Appendix of the Full Text.**

**Associations:** Acute Cardiovascular Care Association (ACCA), Association of Cardiovascular Nursing & Allied Professions (ACNAP), European Association of Cardiovascular Imaging (EACVI), European Association of Preventive Cardiology (EAPC), European Association of Percutaneous Cardiovascular Interventions (EAPCI), European Heart Rhythm Association (EHRA), Heart Failure Association (HFA).

**Councils:** Council for Cardiology Practice.

**Working Groups:** Atherosclerosis and Vascular Biology, Cardiovascular Pharmacotherapy, Cardiovascular Surgery, Coronary Pathophysiology and Microcirculation, Thrombosis.

The content of these ESC Guidelines has been published for personal and educational use only. No commercial use is authorized. No part of the ESC Guidelines may be translated or reproduced in any form without written permission from the ESC. Permission can be obtained upon submission of a written request to Oxford University Press, the publisher of the *European Heart Journal* and the party authorized to handle such permissions on behalf of the ESC ([journals.permissions@oxfordjournals.org](mailto:journals.permissions@oxfordjournals.org)).

**Disclaimer.** The ESC Guidelines represent the views of the ESC and were produced after careful consideration of the scientific and medical knowledge, and the evidence available at the time of their publication. The ESC is not responsible in the event of any contradiction, discrepancy, and/or ambiguity between the ESC Guidelines and any other official recommendations or guidelines issued by the relevant public health authorities, in particular in relation to good use of healthcare or therapeutic strategies. Health professionals are encouraged to take the ESC Guidelines fully into account when exercising their clinical judgment, as well as in the determination and the implementation of preventive, diagnostic, or therapeutic medical strategies; however, the ESC Guidelines do not override, in any way whatsoever, the individual responsibility of health professionals to make appropriate and accurate decisions in consideration of each patient's health condition and in consultation with that patient and, where appropriate and/or necessary, the patient's caregiver. Nor do the ESC Guidelines exempt health professionals from taking into full and careful consideration the relevant official updated recommendations or guidelines issued by the competent public health authorities, in order to manage each patient's case in light of the scientifically accepted data pursuant to their respective ethical and professional obligations. It is also the health professional's responsibility to verify the applicable rules and regulations relating to drugs and medical devices at the time of prescription.

**Martin Czerny (Germany), Victoria Delgado (Netherlands), Paul Dendale (Belgium), Frank Arnold Flachskampf (Sweden), Helmut Gohlke (Germany), Erik Lerkevang Grove (Denmark), Stefan James (Sweden), Demosthenes Katritsis (Greece), Ulf Landmesser (Germany), Maddalena Lettino (Italy), Christian M. Matter (Switzerland), Hendrik Nathoe (Netherlands), Alexander Niessner (Austria), Carlo Patrono (Italy), Anna Sonia Petronio (Italy), Steffen E. Pettersen (United Kingdom), Raffaele Piccolo (Italy), Massimo Francesco Piepoli (Italy), Bogdan A. Popescu (Romania), Lorenz Räber (Switzerland), Dimitrios J. Richter (Greece), Marco Roffi (Switzerland), Franz X. Roithinger (Austria), Evgeny Shlyakhto (Russian Federation), Dirk Sibbing (Germany), Sigmund Silber (Germany), Iain A. Simpson (United Kingdom), Miguel Sousa-Uva (Portugal), Panos Vardas (Greece), Adam Witkowski (Poland), Jose Luis Zamorano (Spain)**

**The disclosure forms of all experts involved in the development of these Guidelines are available on the ESC website [www.escardio.org/guidelines](http://www.escardio.org/guidelines)**

## Keywords

Guidelines • chronic coronary syndromes • angina pectoris • myocardial ischaemia • coronary artery disease • diagnostic testing • imaging • risk assessment • lifestyle modifications • anti-ischaemic drugs • antithrombotic therapy • lipid-lowering drugs • myocardial revascularization • microvascular angina • vasospastic angina • screening

## Table of contents

|                                                                                                              |    |
|--------------------------------------------------------------------------------------------------------------|----|
| 1 Patients with angina and/or dyspnoea, and suspected coronary artery disease .....                          | 3  |
| 1.1 Diagnosis and assessment .....                                                                           | 3  |
| 1.1.1 Exercise electrocardiogram testing .....                                                               | 3  |
| 1.1.2 Stress echocardiography .....                                                                          | 3  |
| 1.1.3 Single-photon emission computed tomography .....                                                       | 3  |
| 1.1.4 Positron emission tomography .....                                                                     | 4  |
| 1.1.5 Stress cardiac magnetic resonance .....                                                                | 4  |
| 1.1.6 Computed tomography .....                                                                              | 4  |
| 1.1.6.1 Coronary computed tomography angiography .....                                                       | 4  |
| 1.1.6.2 Computed tomography-based fractional flow reserve and computed tomography myocardial perfusion ..... | 5  |
| 1.1.7 Hybrid imaging techniques .....                                                                        | 6  |
| 1.1.8 Invasive coronary angiography .....                                                                    | 6  |
| 1.2 Assessment of risk .....                                                                                 | 6  |
| 1.2.1 Event risk stratification using clinical evaluation .....                                              | 6  |
| 1.2.2 Event risk stratification using ventricular function .....                                             | 7  |
| 1.2.3 Recommendations for risk assessment after diagnostic testing .....                                     | 8  |
| 1.2.3.1 Exercise electrocardiogram .....                                                                     | 8  |
| 1.2.3.2 Rest and stress echocardiography .....                                                               | 8  |
| 1.2.3.3 Single-photon emission computed tomography .....                                                     | 8  |
| 1.2.3.4 Positron emission tomography .....                                                                   | 8  |
| 1.2.3.5 Stress cardiac magnetic resonance imaging .....                                                      | 8  |
| 1.2.3.6 Computed tomography .....                                                                            | 8  |
| 1.2.3.7 Hybrid imaging techniques .....                                                                      | 9  |
| 1.2.3.8 Invasive coronary angiography .....                                                                  | 9  |
| 1.3 Pharmacological management .....                                                                         | 9  |
| 1.3.1 Event prevention .....                                                                                 | 12 |

|                             |    |
|-----------------------------|----|
| 1.4 Revascularization ..... | 13 |
| 2 References .....          | 15 |

## List of tables

|                                                                                                                                                                                          |    |
|------------------------------------------------------------------------------------------------------------------------------------------------------------------------------------------|----|
| Supplementary Table 1 Pressure-derived wire-based indexes to invasively measure haemodynamic stenosis severity .....                                                                     | 5  |
| Supplementary Table 2 Mechanisms of action of antianginal drugs .....                                                                                                                    | 10 |
| Supplementary Table 3 Major side effects, contraindications, drug–drug interactions, and precautions of anti-ischaemic drugs .....                                                       | 10 |
| Supplementary Table 4 Characteristics and outcomes of randomized studies of Percutaneous coronary intervention vs. medical therapy in patients with stable coronary artery disease ..... | 13 |

## List of figures

|                                                                                                                                                                                        |    |
|----------------------------------------------------------------------------------------------------------------------------------------------------------------------------------------|----|
| Supplementary Figure 1 The ABC-CHD score calculator .....                                                                                                                              | 6  |
| Supplementary Figure 2 Duke Treadmill Score for risk stratification in chronic coronary syndromes .....                                                                                | 7  |
| Supplementary Figure 3 Pharmacological management in randomized controlled trials comparing percutaneous coronary intervention and medical therapy in chronic coronary syndromes ..... | 9  |
| Supplementary Figure 4 Nomogram for calculation of PRECISE-DAPT score .....                                                                                                            | 12 |

This supplementary data file to the 2019 Guidelines for the diagnosis and management of chronic coronary syndromes (CCS) contains additional material that should be used for further clarification when reading the main document.

# 1 Patients with angina and/or dyspnoea, and suspected coronary artery disease

## 1.1 Diagnosis and assessment

The following sections describe some features of different diagnostic tests. It should be noted that the performance of a given test in different studies varies due to numerous reasons, such as population selection and referral bias. Another potentially important source of variation or bias is the inclusion of a patient in a study based on previous test results or known coronary artery disease (CAD), such as a stenosis on coronary computed tomography angiography (CTA).<sup>1</sup> Therefore, differences between techniques and summary estimates based on meta-analyses should be interpreted with caution, and considered as directional only.

### 1.1.1 Exercise electrocardiogram testing

Exercise electrocardiogram (ECG) testing aims to indirectly detect myocardial ischaemia through exercise-induced ST-T-segment changes. The main diagnostic ECG abnormality consists of horizontal or down-sloping ST-segment depression  $\geq 0.1$  mV, persisting for  $\geq 0.06$ – $0.08$  s after the J-point, in one or more ECG leads. Exercise ECG is of no diagnostic value in the presence of left bundle branch block (LBBB), paced rhythm, and Wolff–Parkinson–White syndrome, in which cases the ST-T-segment changes are not interpretable. Additionally, false-positive results are more frequent in patients with abnormal resting ECG in the presence of left ventricular (LV) hypertrophy, electrolyte imbalance, intraventricular conduction abnormalities, atrial fibrillation,<sup>2,3</sup> or who are being treated with digitalis. To obtain diagnostic information, the test should be symptom/sign-limited and performed without the influence of anti-ischaemic drugs.

There are numerous reviews and meta-analyses regarding the performance of exercise ECG for the diagnosis of CAD, which have shown variable diagnostic yields. In a recent meta-analysis, the sensitivity and specificity for the detection of CAD, defined as diameter stenosis  $\geq 50\%$ , was 58 and 62%, respectively.<sup>1</sup> Studies designed to avoid workup bias have reported lower sensitivities (45–50%) and higher specificities (85–90%).<sup>4,5</sup> The addition of cardiopulmonary exercise testing may improve sensitivity, but this combination of tests is not widely used.<sup>6</sup> The diagnostic performance of exercise ECG is inferior to imaging diagnostic tests and inconclusive results are not infrequent, for example, when 85% of maximum heart rate is not achieved in the absence of symptoms or signs of ischaemia, when exercise is limited by orthopaedic or other non-cardiac problems, or when ECG changes are equivocal. As a result, additional downstream testing is needed more frequently after exercise ECG than after diagnostic tests using imaging.<sup>7–9</sup> However, depending on the availability of other tests, exercise ECG may be considered as an alternative diagnostic test to detect obstructive CAD.<sup>1,10</sup>

Exercise testing on either a bicycle ergometer or a treadmill provides information other than ST-segment changes on event risk, as well as exercise tolerance, symptoms, heart rate response, arrhythmias, and blood pressure (BP) response (see section 3.1.3). Therefore, exercise ECG remains a useful test in many patients with

suspected CAD and is widely available. Exercise stress testing can also be useful to evaluate the efficacy of medical treatment or after revascularization, or to aid the prescription of exercise after control of symptoms. For these indications, exercise stress testing should be performed in patients receiving treatment to evaluate control of ischaemia or effort performance. The effect of routine periodic exercise testing on patient outcomes has not been formally evaluated.

### 1.1.2 Stress echocardiography

Stress echocardiography can be performed with exercise (treadmill or bicycle ergometer) or with pharmacological drugs.<sup>11</sup> An exercise test will provide important information on exercise time, workload changes in heart rate, BP, and ECG. Therefore, exercise has been advocated as the primary choice when feasible because of a more physiological situation compared with pharmacological tests. However, there are no differences in sensitivity and specificity between the two methods.<sup>12</sup> In a recent meta-analysis of diagnostic studies, the pooled sensitivity and specificity of stress echocardiography for the detection of obstructive CAD (defined as diameter stenosis  $\geq 50\%$ ) was 85 and 82%, respectively.<sup>1</sup> However, an exercise test has fewer potential side effects compared with a pharmacological test.

A pharmacological test is useful when facilities for exercise testing are not available or if the patient is unable to do an adequate exercise test. The preferred pharmacological drug to produce supply-demand mismatch is dobutamine (inotropic stress). A contrast agent is necessary when  $\geq 2$  LV segments are not visualized at rest.<sup>13</sup> The use of contrast also improves accuracy for CAD detection in patients with reasonable acoustic windows and might be used on a general basis in stress echocardiography.<sup>14</sup> Strain imaging has been suggested for improved accuracy during stress echocardiography.<sup>15</sup> However, a consensus statement from the American Society of Echocardiography/European Association of Cardiovascular Imaging does not encourage the clinical use of strain or tissue Doppler techniques in stress testing.<sup>16</sup> The role of three-dimensional echocardiography is also somewhat unclear, and its prognostic value in terms of ischaemia has not yet been proved.<sup>17–20</sup>

The main advantage of stress echocardiography compared with other functional tests is the good availability of the method. Stress echocardiography provides information on both LV systolic and diastolic function, in addition to valve function. The technique is free of radiation exposure, and provides similar diagnostic and prognostic accuracy as radionuclide stress perfusion imaging and cardiac magnetic resonance (CMR), but at a lower cost. It has also been shown that exercise stress echocardiography is more cost-effective than exercise ECG.<sup>21</sup>

The main challenge with stress echocardiography is its dependence on operator expertise and the visual assessment of wall motion abnormalities.

### 1.1.3 Single-photon emission computed tomography

Single-photon emission computed tomography (SPECT) myocardial perfusion imaging produces images of regional myocardial tracer uptake, which reflect relative myocardial blood flow at rest, and during dynamic exercise or pharmacological stress.<sup>22</sup> In addition to perfusion distribution, increased uptake of the perfusion agent in the

lung identifies stress-induced ventricular dysfunction in patients with severe and extensive CAD. Transient ischaemic dilatation and reduced post-stress ejection fraction are important non-perfusion predictors of severe CAD. The technique provides information on the presence or absence, as well as the location and extent, of myocardial ischaemia, myocardial infarction (MI) (and viability), and ventricular function. The SPECT studies can be performed either using an exercise test or using pharmacological stress testing, especially in patients who are unable to exercise adequately or present with LBBB. With the most commonly used technetium-99m radiopharmaceuticals, the estimated radiation exposure to the patient is ~10 mSv, but the radiation dose can be halved with the use of stress-only imaging and new high-efficiency cardiac SPECT cameras.<sup>23</sup>

The diagnostic accuracy of exercise and pharmacological stress SPECT myocardial perfusion imaging in the detection of CAD has been studied extensively. A meta-analysis found pooled sensitivity of 87% and specificity of 70% when CAD was defined as angiographic coronary stenosis >50%.<sup>1</sup> The test also performs well in studies using a functional definition of CAD based on invasive fractional flow reserve (FFR) (sensitivity 73 - 74% and specificity 79 - 83%).<sup>1,24</sup> Global reductions in myocardial perfusion, such as in the setting of multivessel disease, may cause underestimation of ischaemic burden in the relative perfusion images produced by SPECT. Compared with exercise ECG, SPECT myocardial perfusion imaging is more accurate for the detection of obstructive CAD, and provides additional information on the location of myocardial ischaemia and the extent of ischaemic burden.<sup>1</sup> The cost-effectiveness of SPECT myocardial perfusion imaging is highest in patients in the higher range of intermediate pre-test probability (PTP) of CAD.<sup>25</sup>

### 1.1.4 Positron emission tomography

Positron emission tomography (PET) perfusion imaging uses <sup>82</sup>Rb, <sup>13</sup>N-ammonia, or <sup>15</sup>O-water as radioactive myocardial perfusion tracers to evaluate myocardial perfusion and function, at rest and during pharmacological stress.<sup>26</sup> Similar to SPECT, the technique provides information on the presence or absence of myocardial ischaemia, location and extent of ischaemia, MI, residual viability, and ventricular function. In addition, PET has the unique ability to quantify blood flow in mL/min/g, which allows the detection of microvascular disease and improved evaluation of ischaemic burden in multivessel CAD. The risks associated with pharmacological vasodilator stress with regard to SPECT similarly apply to PET. The radiation exposure to the patient is lower than that with SPECT (~1 - 4 mSv) due to the short radioactive half-life of PET perfusion tracers.

PET myocardial perfusion imaging has high diagnostic performance in the detection of CAD in terms of image quality, interpretative certainty, and diagnostic accuracy.<sup>27-30</sup> A meta-analysis of diagnostic studies found pooled sensitivity and specificity of 90 and 85%, respectively, when CAD was defined as angiographic coronary stenosis of >50%, and sensitivity and specificity of 89 and 85%, respectively, when CAD was defined by FFR.<sup>1</sup> Image quality of PET is affected less than that of SPECT in obese patients.<sup>30</sup> Quantification of myocardial blood flow facilitates the detection of extensive, high-risk CAD (balanced ischaemia).<sup>31-34</sup> Compared with SPECT scanners and radiotracers, PET scanners and perfusion tracers are less widely available, and compared with the other stress imaging techniques, PET is less commonly used to diagnose CAD.

### 1.1.5 Stress cardiac magnetic resonance

Stress CMR can be performed with pharmacological drugs by assessing both myocardial perfusion and changes in LV wall motion in response to stress. Vasodilator and dobutamine are the main drugs.<sup>35</sup> In clinical practice, physical exercise is never used in stress CMR. Dobutamine will increase flow demand and induce wall motion abnormalities due to ischaemia in the presence of CAD, similar to dobutamine stress echocardiography, and the safety profiles are comparable.<sup>36</sup> Vasodilators will increase coronary flow and will cause differences in myocardial perfusion in patients with CAD. The perfusion technique with vasodilator stress perfusion is the most commonly used method. Analyses are either by visual assessment of low-signal areas with reduced perfusion or with different software tools. There have been several attempts to establish semiquantitative and quantitative CMR perfusion analysis, but the clinical use of these tools remains unclear.<sup>37</sup>

The diagnostic accuracy of CMR perfusion imaging is high<sup>24,28,38,39</sup> and has several advantages, with no attenuation artefacts, high spatial resolution, and no radiation exposure. In a meta-analysis, pooled sensitivity and specificity for the detection of CAD (defined as diameter stenosis ≥50%) was 90 and 80%, respectively.<sup>1</sup> CMR perfusion imaging is also well suited for women,<sup>40</sup> but the impact of microvascular disease remains unclear.<sup>41</sup> The main disadvantages are CMR's low availability, the high-level of expertise that is required, non-quantitative analyses, and cost issues.

### 1.1.6 Computed tomography

Modern multidetector row computed tomography (CT) systems, with the ability to acquire at least 64 slices with submillimetre collimation simultaneously, and with the option of ECG-triggered image acquisition or ECG-gated image reconstruction, allow robust imaging of the coronary arteries in many patients.<sup>42</sup> CT imaging can be performed without a contrast agent to detect and quantify coronary calcium. The coronary calcium score refines estimates of PTP of CAD compared with models based on age, sex, and the type of chest pain.<sup>43</sup> However, the extent of calcium shows no reliable correlation with the presence and severity of stenoses. After intravenous injection of a contrast agent, coronary CTA depicts the coronary lumen and calcified, as well as non-calcified, plaque.<sup>42</sup> Acquisition protocols for coronary CTA should include special measures to keep radiation exposure as low as possible.<sup>42</sup>

#### 1.1.6.1 Coronary computed tomography angiography

According to expert consensus, only patients with adequate breath-hold capabilities, without being severely overweight, and in sinus rhythm, should undergo coronary CTA.<sup>42</sup> Heart rate should be lowered, optimally to <60 b.p.m.<sup>42</sup> Nitrates are given sublingually to achieve coronary dilatation. The presence of pronounced coronary calcium can hinder the interpretation of coronary CTA and negatively affect its specificity. The decision to proceed with coronary CTA in patients with severe calcification must be made on an individual basis, taking overall image quality and the distribution of calcium into account.

In comparative studies to coronary angiography, coronary CTA displayed very high sensitivity for the detection of coronary artery stenoses in patients with suspected CAD (95.6% pooled sensitivity in a meta-analysis comprising 30 studies and 3722 individuals).<sup>44</sup> Pooled

specificity, at 81.5%, was lower. A very low negative likelihood ratio (0.022) results from the high sensitivity for identifying coronary stenoses. Several prospective registries have shown that the absence of stenoses in coronary CTA is associated with an extremely good prognosis,<sup>45,46</sup> and the large, prospective randomized PROMISE (Prospective Multicenter Imaging Study for Evaluation of Chest Pain) trial showed that the event rate in patients in whom coronary CTA was used as the first diagnostic test was not different from the event rate in patients who underwent ischaemia testing as a first test.<sup>47</sup> In the prospective SCOT-HEART (Scottish Computed Tomography of the HEART) study, CAD-related event rates were lower in individuals with CAD in whom the initial workup was complemented by coronary CTA.<sup>48</sup> It is important to note that poor image quality, severe calcifications, and non-expert interpretation may lead to overestimation of stenosis severity in coronary CTA.<sup>49</sup> In patients with previous revascularization (e.g. bypass grafts or stents), the accuracy of coronary CTA is frequently impaired by blooming artefacts and incomplete evaluation of native vessels.

1.1.6.2 Computed tomography-based fractional flow reserve and computed tomography myocardial perfusion

Coronary CTA is a morphological imaging tool that does not provide information on the haemodynamic relevance of a coronary artery stenosis. It can be complemented by 'virtual' CT-based FFR (FFR<sub>CT</sub>)<sup>50</sup> or stress CT myocardial perfusion imaging<sup>24,51</sup> to improve correlation with a combination of invasive angiography plus ischaemia testing. FFR<sub>CT</sub> uses anatomical data sets acquired by CT at rest, based on which FFR results are simulated. Comparative studies have shown an accuracy of ~85% compared with invasive FFR measurements.<sup>51</sup> Retrospective registry analyses and trial substudies, as well as small randomized trials in which management decisions were based on coronary CTA with FFR<sub>CT</sub>, have demonstrated that non-ischaemic FFR<sub>CT</sub> results are associated with a favourable prognosis.<sup>52–54</sup> In patients with intermediate-range coronary stenosis, FFR<sub>CT</sub> has been shown to be effective in differentiating patients who do not require further diagnostic testing or intervention from higher-risk patients, in whom further testing with invasive coronary angiography (ICA) and possibly intervention may be

**Supplementary Table I** Pressure-derived<sup>a</sup> wire-based indexes to invasively measure haemodynamic stenosis severity

|                  |                       | Indexes           | Validation                               | Diagnostic accuracy (%) | +LR                                                      | -LR       | References |
|------------------|-----------------------|-------------------|------------------------------------------|-------------------------|----------------------------------------------------------|-----------|------------|
| <b>Diagnosis</b> | <b>Hyperaemic</b>     | FFR               | Exercise ECG, thallium scintigraphy, DSE | 93                      | 88                                                       | 0.12      | 61         |
|                  |                       |                   | CMR                                      | 92                      | 11.72                                                    | 0.09      | 62         |
|                  |                       | FFR               | H <sub>2</sub> <sup>15</sup> O-PET       | -                       | 4.5                                                      | 0.23      | 63         |
|                  |                       | FFR               | <sup>13</sup> N-PET                      | 73.9                    | 2.9                                                      | 0.38      | 64         |
|                  |                       | cFFR              | FFR                                      | 85.8                    | 16.13                                                    | 0.25      | 65         |
|                  | <b>Non-hyperaemic</b> | iwFR              | FFR                                      | 80.4–82.5               | 4.48–5.98                                                | 0.26–0.31 | 66,67      |
|                  |                       |                   | <sup>13</sup> N-PET                      | 71.3                    | 2.47                                                     | 0.4       | 64         |
|                  |                       | Pd/Pa             | FFR                                      | 81.5                    | 6.41                                                     | 0.27      | 66         |
|                  |                       |                   | iwFR                                     | 93                      | 16.32                                                    | 0.09      | 68         |
|                  |                       |                   | <sup>13</sup> N-PET                      | 74.8                    | 3.03                                                     | 0.37      | 64         |
|                  |                       | dPR               | FFR                                      | 78                      | 8.57                                                     | 0.43      | 69         |
|                  |                       |                   | iwFR                                     | 98                      | 99                                                       | 0.08      | 69         |
| RFR              | FFR                   | 81.3              | 4.38                                     | 0.24                    | 70                                                       |           |            |
|                  | iwFR                  | 97.4              | 94.5                                     | 0.06                    | 70                                                       |           |            |
| <b>Prognosis</b> |                       | <b>Comparator</b> | <b>Study design</b>                      | <b>Clinical benefit</b> |                                                          |           |            |
|                  | <b>Hyperaemic</b>     | FFR               | Angiographic guidance, medical therapy   | Superiority             | MACE, spontaneous MI, urgent revascularization (5 years) |           | 71–78      |
|                  | <b>Non-hyperaemic</b> | iwFR              | FFR guidance                             | Non-inferiority         | MACE (1 year)                                            |           | 79,80      |
|                  |                       | Pd/Pa             | -                                        | -                       | -                                                        |           | -          |
|                  |                       | dPR               | -                                        | -                       | -                                                        |           | -          |
|                  |                       | RFR               | -                                        | -                       | -                                                        |           | -          |

© ESC 2019

cFFR = contrast fractional flow reserve; CMR = cardiac magnetic resonance; dPR = diastolic pressure ratio; DSE = dobutamine stress echocardiography; ECG = electrocardiogram; FFR = fractional flow reserve; iwFR = instantaneous wave-free ratio; +LR = positive likelihood ratio; -LR = negative likelihood ratio; MACE = major adverse cardiovascular events; MI = myocardial infarction; NHPI = non-hyperaemic pressure-derived indexes; Pd/Pa = coronary pressure to aortic pressure ratio; PET = positron emission tomography; RFR = resting full-cycle ratio.

<sup>a</sup>Only indexes derived from pressure measurements are included, and their diagnostic accuracy is compared with abnormal results by either non-invasive functional testing or FFR as the reference standard. FFR has the highest diagnostic accuracy. The NHPIs all have good diagnostic accuracy. Of note, Pd/Pa, dPR, and RFR have a high positive likelihood ratio (>10) and low negative likelihood ratio (<1) in predicting abnormal iwFR results, suggesting a class effect. This class effect of all NHPIs has been reflected in a recent change in the 'Appropriate use criteria for coronary revascularization in patients with stable ischaemic heart disease of the ACC/AATS/AHA/ASE/ASNC/SCAI/SCCT/STS' (American College of Cardiology/American Association for Thoracic Surgery/American Heart Association, American Society of Echocardiography/American Society of Nuclear Cardiology/Society for Cardiovascular Angiography and Interventions/Society of Cardiovascular Computed Tomography/Society of Thoracic Surgeons).<sup>81</sup>

needed.<sup>55,56</sup> In a randomized study comparing coronary CTA with FFR<sub>CT</sub> and ICA, CTA with FFR<sub>CT</sub> was suitable for diagnosing and guiding revascularization in patients with advanced multivessel CAD.<sup>57,58</sup> Prospective outcome trials comparing coronary CTA plus FFR<sub>CT</sub> to alternative forms of non-invasive testing are currently not available.

Stress CT myocardial perfusion imaging can be performed with various protocols, and has a sensitivity of 88% and specificity of 80% in comparison with invasive FFR,<sup>24</sup> but has not been validated in prospective studies.

## 1.7 Hybrid imaging techniques

Hybrid SPECT/CT, PET/CT, and PET/CMR scanners have recently become available. Hybrid imaging enables the combination of coronary anatomy with non-invasive CTA with the detection of myocardial ischaemia by perfusion imaging. Since the previous version of the Guidelines, new diagnostic studies on hybrid imaging for evaluation of CAD have been published, and a meta-analysis of available evidence indicates a higher specificity without a significant decrease in sensitivity compared with single techniques.<sup>59</sup> However, there is still a need to clarify which patients can benefit from hybrid imaging and how to optimally combine different modalities.<sup>60</sup>

## 1.8 Invasive coronary angiography

A number of new hyperaemic and resting indexes for physiological assessment have been introduced recently. Available evidence regarding

their diagnostic and prognostic power is listed in *Supplementary Table 1*. Most recently proposed indexes have been compared with FFR as the standard to test physiological equivalence. Prospective outcome trials are available for FFR and instantaneous wave-free ratio (iwFR).

## 1.2 Assessment of risk

### 1.2.1 Event risk stratification using clinical evaluation

Scores that apply clinical parameters have been shown to predict outcomes among patients with chronic CAD. Moreover, if the clinical parameters are complemented by biomarkers, such a risk score may be even more accurate. Recently, a biomarker-based risk model to predict cardiovascular mortality in patients with stable CAD was developed from a randomized trial cohort of 13 164 patients and externally validated in a cohort of 1547 patients.<sup>82</sup> The three biomarkers found to be of greatest importance were N-terminal pro-B-type natriuretic peptide, high-sensitivity cardiac troponin T, and low-density lipoprotein cholesterol. The final prediction model included age (A), biomarkers (B), and clinical variables (C) (see *Supplementary Figure 1*). The ABC-CHD (coronary heart disease) model had high discriminatory ability for cardiovascular death (c-index of 0.81 in the derivation cohort and 0.78 in the validation cohort).

A 12 lead ECG should be a part of risk stratification in every patient to delineate heart rhythm and heart rate, to detect changes suggestive of silent ischaemia/infarction, and to discern abnormalities

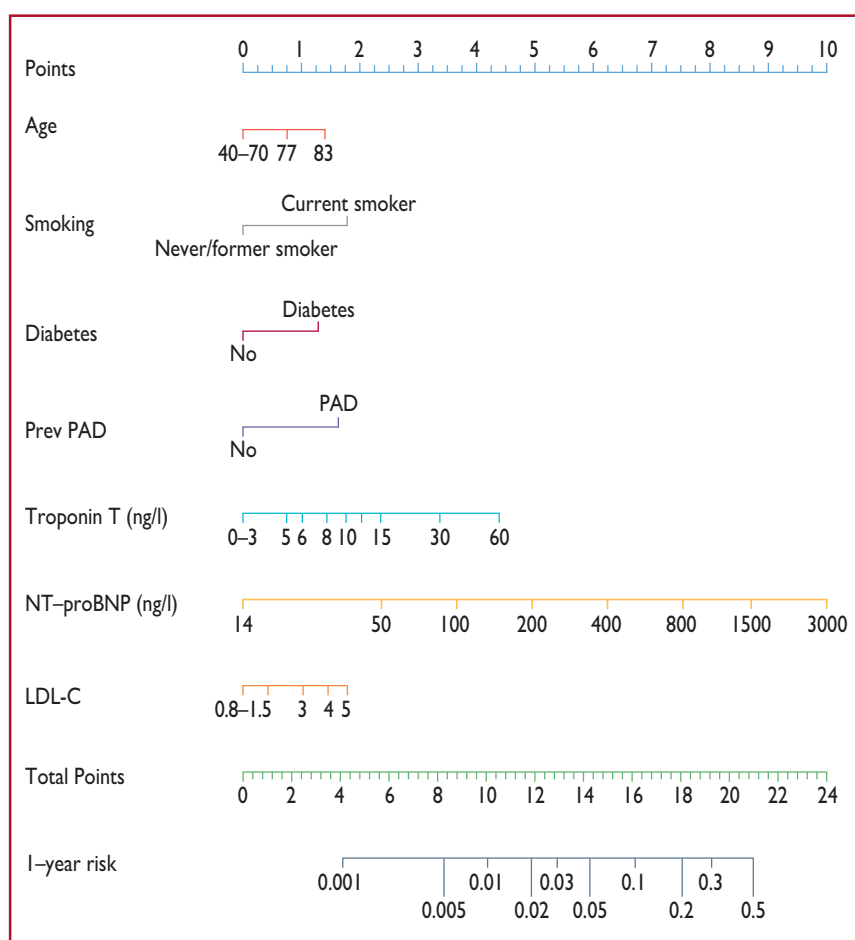

©ESC 2019

**Supplementary Figure 1** The ABC-CHD score calculator. CHD = coronary heart disease; LDL-C = low-density lipoprotein cholesterol; NT-proBNP = N-terminal pro-B-type natriuretic peptide; PAD = peripheral artery disease; Prev = previous.

in the specific electrocardiographic segments (e.g. PR, QRS, and QT intervals).

**1.2.2 Event risk stratification using ventricular function**

The strongest predictor of long-term survival is LV function. In patients with CCS, mortality increases as left ventricular ejection fraction (LVEF) declines. In the CASS (Coronary Artery Surgery Study) registry, the 12 year survival rates in patients with ejection fractions  $\geq 50$ , 35–49, and  $< 35\%$  were 73, 54, and 21%, respectively ( $P=0.0001$ ).<sup>83</sup> Hence, a patient with an LVEF  $< 50\%$  is already at high risk for cardiovascular death (annual mortality  $> 3\%$ ), even without accounting for additional event risk factors such as the extent of ischaemia. As a reduced LVEF  $< 50\%$  confers such an important increase in event risk, it may be important not to miss obstructed vessels causing ischaemia in such patients.<sup>84,85</sup>

Although the likelihood of preserved ventricular systolic function is high in patients with a normal ECG, a normal chest X-ray, and no

history of MI,<sup>86</sup> asymptomatic ventricular dysfunction is not uncommon.<sup>87</sup> Therefore, a resting echocardiogram is recommended in all patients with suspected CCS. An echocardiographic study is an excellent diagnostic tool for risk prediction in CCS. It will provide valuable information on valvular diseases and anatomy, in addition to ejection fraction and MI.

Newer diagnostic tools for the assessment of myocardial function have emerging importance. In patients with CAD, 50% of deaths occur suddenly and most of these patients have an ejection fraction  $> 50\%$ .<sup>88</sup> Therefore, ejection fraction has limited abilities as a risk marker in these patients. Systolic function can be reduced without a decrease in LVEF, and a global longitudinal strain (GLS) decreased by  $> 2$  SD from the lower normal reference value has demonstrated incremental value in the risk assessment of patients with CCS, especially in those whose ejection fraction is  $> 35\%$ .<sup>89–91</sup> The echocardiogram begins with visual assessment and measurement of LVEF, followed by the measurement of GLS if LVEF is normal. A finding of

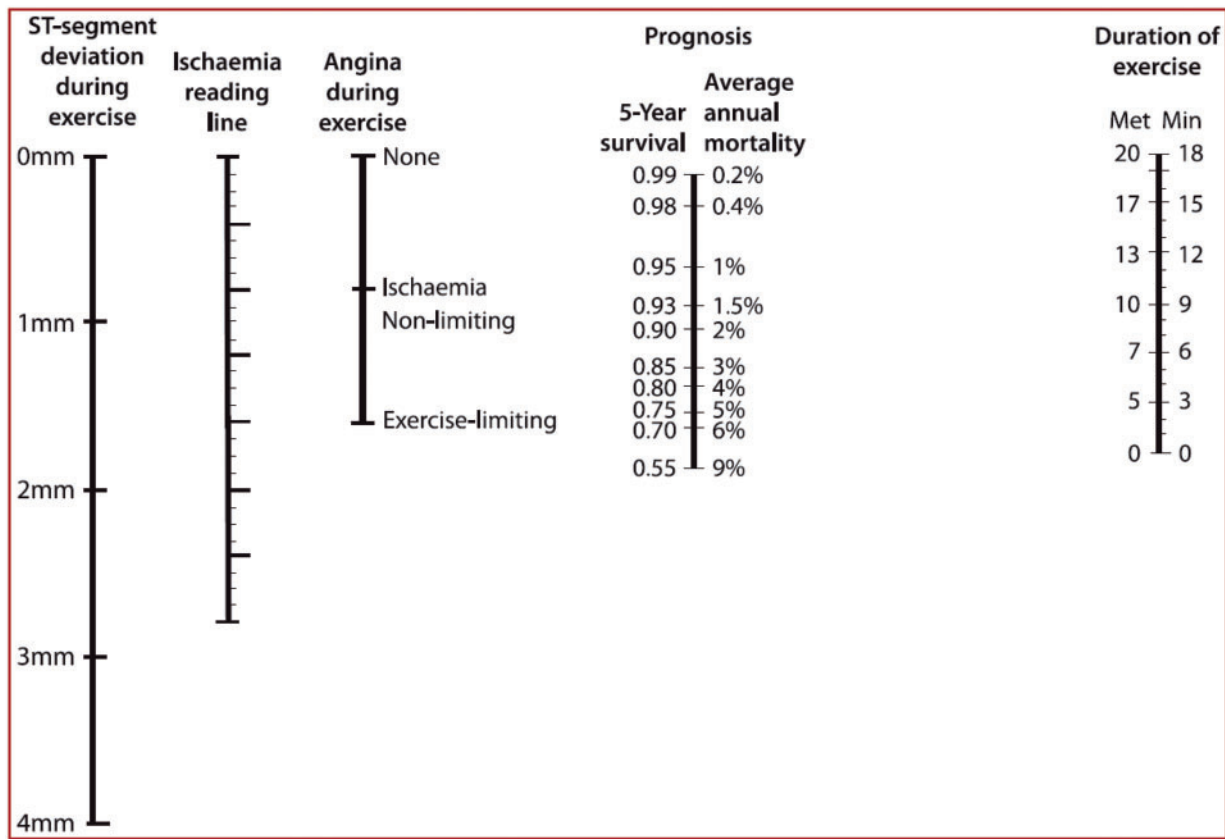

**Supplementary Figure 2** Duke Treadmill Score for risk stratification in chronic coronary syndromes. Nomogram of the prognostic relations embodied in the Duke Treadmill Score.<sup>97</sup> Determination of prognosis proceeds through five steps. First, the observed amount of exercise-induced ST-segment deviation (the largest elevation or depression after resting changes have been subtracted) is marked on the line for ST-segment deviation during exercise. Second, the observed degree of angina during exercise is marked in the line for angina. Third, the marks for ST-segment deviation and degree of angina are connected with a straight edge. The point where this line intersects the ischaemia-reading line is noted. Fourth, the total number of minutes of exercise in treadmill testing according to the Bruce protocol [or the equivalent in multiples of resting oxygen consumption (METs) from an alternative protocol] is marked on the exercise-duration line. In countries where a bicycle ergometer is used one may—as a rule of thumb—assume the following: 3 METs  $\approx$  25 W, 5 METs  $\approx$  75 W, 6–7 METs  $\approx$  100 W, 9 METs  $\approx$  150 W, and 13 METs  $\approx$  200 W. Fifth, the mark for ischaemia is connected with that for exercise duration. The point at which this line intersects the line for prognosis indicates the 5 year survival rate and average annual mortality for patients with these characteristics.

decreased GLS is a risk marker of mortality and malignant arrhythmias.

### 1.2.3 Recommendations for risk assessment after diagnostic testing

#### 1.2.3.1 Exercise electrocardiogram

Exercise ECG has been extensively validated for evaluation of event risk in CCS patients. The occurrence of ST-segment depression coupled with exertional angina at a low workload is associated with a high risk of cardiovascular mortality. Exercise capacity is also a strong prognostic indicator.<sup>92–94</sup>

The prognosis of patients with a normal exercise ECG and a low clinical risk for severe CAD is excellent (annual rate of cardiac death or MI is <1%).<sup>95</sup> The Duke Treadmill Score (*Supplementary Figure 2*) is a validated tool for the identification of patients with a high event rate (>3% annual rate of cardiovascular death)<sup>96</sup> (<http://www.cardiol.org/tools/medcalc/duke/>).

#### 1.2.3.2 Rest and stress echocardiography

An echocardiographic study is an excellent diagnostic tool for risk prediction for CCS patients. It provides valuable information on valvular diseases and anatomy, in addition to ejection fraction and myocardial function. Newer diagnostic tools for the assessment of myocardial function have emerging importance. Stress echocardiography is a very effective diagnostic tool for risk prediction and stratifying patients with CCS.<sup>98</sup> The risk of future events increases with the extent and severity of inducible wall motion abnormalities. Even in patients with apparently normal myocardial function at rest, findings of inducible wall motion abnormalities in  $\geq 3$  of the 16 segments of the standard LV model should be regarded as indicative of high event risk (corresponding to an annual mortality >3%).<sup>99,100</sup> The prognostic value of inducible myocardial ischaemia together with other clinical risk markers is excellent.<sup>11,101</sup> Exercise echocardiography has a high negative predictive value for primary and secondary cardiac events.<sup>102</sup> A normal stress echocardiogram yields an annual risk of <1%, similar to that for a normal stress myocardial perfusion scan.<sup>103</sup> Stress echocardiography has the advantage of being able to identify the location of ischaemia and should therefore be preferred to an exercise ECG.

#### 1.2.3.3 Single-photon emission computed tomography

Myocardial perfusion imaging using SPECT is a well-documented method of non-invasive risk stratification for CCS patients.<sup>104</sup> The prognostic value of inducible myocardial ischaemia together with other clinical risk markers is excellent. Large stress-induced perfusion defects, defects in multiple coronary artery territories, transient post-stress ischaemic LV dilatation, and increased lung uptake of perfusion tracer in post-stress images are adverse prognostic indicators.

A stress-induced reversible perfusion deficit  $\geq 10\%$  of the total LV myocardium has been reported across a number of prognostic series to denote moderate-to-severe ischaemia associated with a high event rate in CCS patients (annual rate of cardiovascular death or MI >3%).<sup>105</sup> Based on observational studies, these patients may benefit from ICA and revascularization.<sup>84,106</sup> The ongoing randomized ISCHEMIA (International Study of Comparative Health Effectiveness with Medical and Invasive Approaches) trial<sup>107</sup> will provide further

information on whether an initial invasive strategy in addition to optimal medical therapy in patients with CAD, and at least moderate inducible ischaemia, improves outcomes. A normal stress perfusion study is associated with a low ( $\leq 1\%$  per year) subsequent rate of cardiac death and MI.<sup>95</sup>

#### 1.2.3.4 Positron emission tomography

The extent and severity of myocardial ischaemia on PET myocardial perfusion imaging has also been well validated for determining prognosis in patients with CCS, similar to SPECT.<sup>108</sup> Moreover, reduced coronary flow reserve based on quantification of myocardial perfusion predicts high coronary risk, independently of and incrementally to the presence and extent of relative perfusion defects in different patient populations.<sup>109–111</sup> A normal PET perfusion study is associated with a low ( $\leq 1\%$  per year) subsequent rate of cardiac events.<sup>95,108</sup>

#### 1.2.3.5 Stress cardiac magnetic resonance imaging

CMR is useful for risk prediction and for guidance of revascularization in patients with CCS.<sup>112</sup> A comprehensive study including cardiac anatomy, function, perfusion, and viability can be performed. Abnormal stress CMR has shown independent prognostic value in a 5 year follow-up study in patients with suspected CCS.<sup>113</sup> Myocardial ischaemia detected by CMR stress perfusion or dobutamine can identify patients at high risk for subsequent cardiac death and non-fatal MI, with accuracy similar to other functional tests.<sup>114,115</sup> The detection of myocardial scarring by late gadolinium enhancement CMR in patients without an inducible perfusion abnormality has also been associated with a greater risk of a bad prognosis.<sup>116</sup> The prognostic value of a negative stress CMR is similar to that of other functional tests and is associated with a cardiovascular event rate of <1% per year.<sup>115,117</sup> The number of LV segments with scarring is a predictor of mortality independently of LVEF.<sup>118</sup> Novel T1 mapping techniques, showing diffuse scarring and infiltration, might also be promising future tools for risk prediction, but are not yet recommended for clinical use.<sup>119</sup>

#### 1.2.3.6 Computed tomography

Several prospective registries have shown that an absence of stenoses in coronary CTA is associated with an extremely good prognosis.<sup>45,46</sup> The large, prospective, randomized PROMISE trial showed that the event rate in patients in whom coronary CTA was used as the first diagnostic test did not differ from that in patients who underwent ischaemia testing as a first test.<sup>47</sup> In the prospective SCOT-HEART study, CAD event rates were lower in individuals with suspected CAD in whom the initial workup was complemented by coronary CTA.<sup>48</sup> The trials evaluating outcomes after coronary CTA included mostly patients with a low clinical likelihood.

In addition to visualizing the coronary artery lumen and stenoses, coronary CTA can display coronary atherosclerotic plaque if image quality is adequate. The specific clinical significance of non-obstructive plaque in coronary CTA has not been clarified. Trials and registries have demonstrated a slightly elevated event rate in individuals with non-obstructive coronary atherosclerotic plaque compared with individuals with completely normal coronary arteries on CT.<sup>120,121</sup> One registry analysis has suggested that the prognostic



benefit of statin therapy is limited to individuals with coronary atherosclerotic plaque, while patients without detectable plaque derive no benefit from statin therapy.<sup>122</sup> The use of coronary CTA as a risk-stratification tool in asymptomatic individuals is not supported by data as no prospective, randomized intervention studies have been performed to date.

1.2.3.7 Hybrid imaging techniques

Although the data on hybrid imaging are limited, this approach offers the possibility of improving prognostic value. Studies have shown that the coronary calcium score adds incremental prognostic value to perfusion imaging.<sup>101</sup> In patients with intermediate coronary lesions, evidence of ischaemia at an anatomically appropriate location is associated with a high event risk after hybrid imaging.<sup>123,124</sup>

1.2.3.8 Invasive coronary angiography

Despite the recognized limitations of ICA in identifying ischaemia-inducing coronary stenoses and vulnerable plaques, the extent, severity of luminal obstruction, and location of coronary disease on coronary angiography are important prognostic indicators in patients with angina.<sup>125–127</sup> Several prognostic indices have been used to relate the severity of disease to the risk of subsequent cardiac events; the simplest and most widely used is the classification of disease into one-, two-, or three-vessel, or left main (LM) stem CAD. In the CASS

registry of medically treated patients, the 12 year survival rate of patients with normal coronary arteries was 91%, compared with 74% for those with one-vessel disease, 59% for those with two-vessel disease, and 50% for those with three-vessel disease ( $P < 0.01$ ).<sup>83</sup>

With the exception of coronary stenoses >90%, which have unequivocally been associated with functional abnormalities, FFR should be performed during ICA in patients with coronary stenosis <90% and inconclusive non-invasive stress testing.<sup>128</sup> In addition, patient-level meta-analysis and prespecified subgroup analysis of randomized controlled trials have demonstrated an inverse relationship between FFR values, and the risk of clinical endpoints, at 1 and 2 years, respectively.<sup>129,130</sup> Intravascular imaging techniques (e.g. intravascular ultrasound or optical coherence tomography) have demonstrated good diagnostic accuracy in predicting FFR, especially in stenoses located in the LM, and may be considered to assess LM stenosis severity, especially if further percutaneous coronary intervention optimization is being adopted.<sup>131,132</sup> In addition, plaque burden, minimal luminal area, and thin-cap fibroatheroma, as defined by virtual histology intravascular ultrasound, were associated with future adverse lesion-specific cardiovascular events.<sup>133</sup>

1.3 Pharmacological management

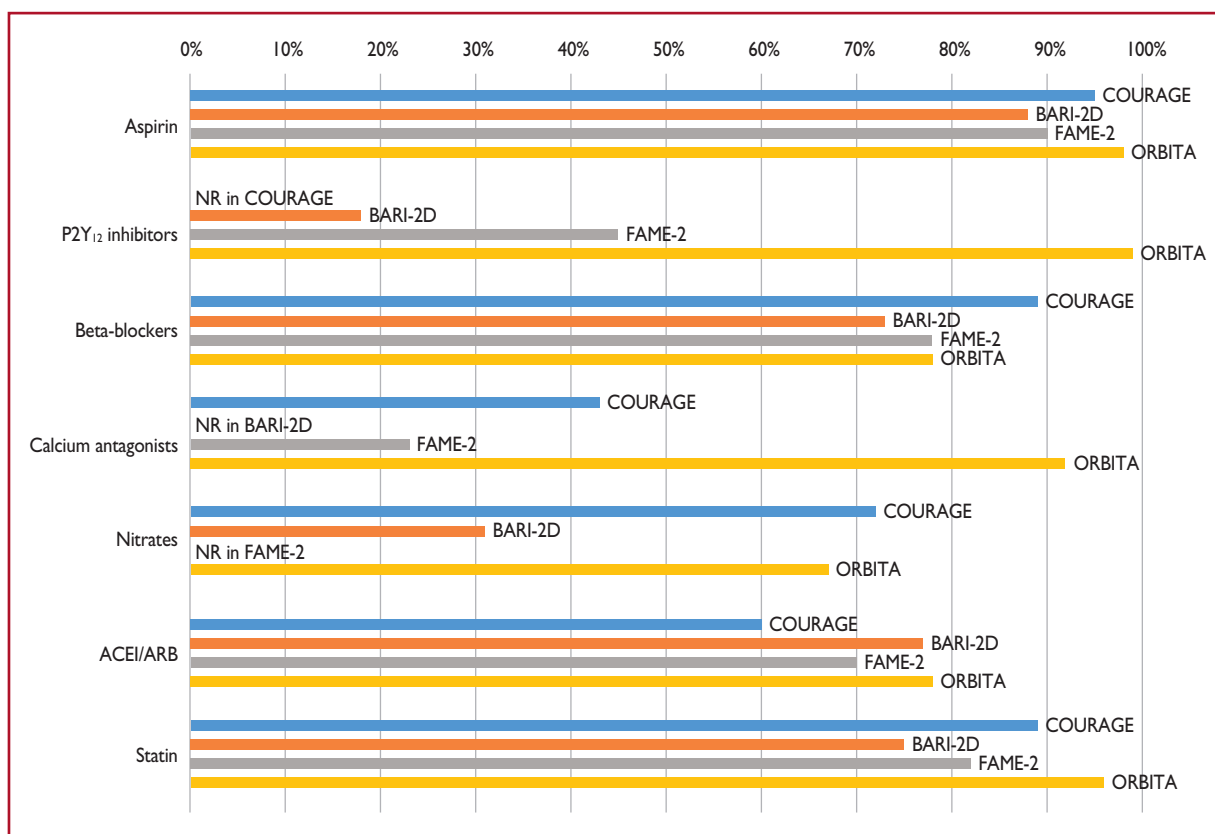

**Supplementary Figure 3** Pharmacological management in randomized controlled trials comparing percutaneous coronary intervention and medical therapy in chronic coronary syndromes.<sup>73,134–136</sup> ACEI = angiotensin-converting enzyme inhibitor; ARB = angiotensin receptor blocker; BARI-2D = Bypass Angioplasty Revascularization Investigation 2 Diabetes; COURAGE = Clinical Outcomes Utilizing Revascularization and Aggressive Drug Evaluation; FAME-2 = Fractional Flow Reserve versus Angiography for Multivessel Evaluation 2; NR = not reported; ORBITA = Objective Randomised Blinded Investigation with optimal medical Therapy of Angioplasty in stable angina; PCI = percutaneous coronary intervention.

**Supplementary Table 2 Mechanisms of action of antianginal drugs**

| Drugs         | Mechanisms of action                                                                                                                                                                                                                                                                                                                                                                                                                                                                                                                                                                                                                                                                                                                      |
|---------------|-------------------------------------------------------------------------------------------------------------------------------------------------------------------------------------------------------------------------------------------------------------------------------------------------------------------------------------------------------------------------------------------------------------------------------------------------------------------------------------------------------------------------------------------------------------------------------------------------------------------------------------------------------------------------------------------------------------------------------------------|
| Beta-blockers | Beta-blockers reduce heart rate, contractility, and atrioventricular conduction, thus reducing myocardial oxygen demand and time-to-angina onset during exercise. By prolonging the diastolic period, beta-blockers may increase the perfusion of ischaemic areas. Beta-blockers differ with respect to several clinical features, including cardioselectivity (beta <sub>1</sub> selectivity) and sympathomimetic activity, but their clinical efficacy seems to be equivalent. <sup>137</sup> The most used beta-blockers in Europe are those with predominant beta <sub>1</sub> blockade (e.g. metoprolol, bisoprolol, atenolol, and nebivolol). Carvedilol, a non-beta <sub>1</sub> -selective beta-blocker, is also frequently used. |
| CCBs          | CCBs act chiefly by vasodilation and reduction of the peripheral vascular resistance. CCBs are a heterogeneous group of drugs that can be classified chemically into the DHPs and the non-DHPs, their common pharmacological property being selective inhibition of the L-channel opening in vascular smooth muscle and in the myocardium. DHP drugs (amlodipine, nifedipine, and felodipine) have a greater vascular selectivity. The non-DHPs (diltiazem and verapamil) decrease heart rate and myocardial inotropism, both effects contributing to their antianginal properties and to their adverse effects.                                                                                                                          |
| Nitrates      | By means of their active component nitric oxide, nitrates offer angina relief by dilatation of peripheral and coronary arteries, and, mostly, peripheral veins, with corresponding reductions in systemic vascular resistance, coronary blood flow redistribution, and preload. <sup>138,139</sup>                                                                                                                                                                                                                                                                                                                                                                                                                                        |
| Ivabradine    | Ivabradine is a heart rate-lowering drug that selectively inhibits the sinus node I <sub>f</sub> pacemaker current, thereby decreasing myocardial oxygen demand without an effect on inotropism or BP. <sup>140</sup>                                                                                                                                                                                                                                                                                                                                                                                                                                                                                                                     |
| Nicorandil    | Nicorandil promotes systemic venous and coronary vasodilation, and stimulates the ATP-sensitive potassium channels of the vascular smooth muscle, with no effect on contractility or conduction.                                                                                                                                                                                                                                                                                                                                                                                                                                                                                                                                          |
| Ranolazine    | Ranolazine is a selective inhibitor of the late inward sodium current, which, at doses of 500 - 2000 mg daily, exerts beneficial effects on angina frequency and exercise tolerance test through inhibition of calcium overload in the cardiomyocytes, without substantial changes in heart rate or BP. <sup>141,142</sup>                                                                                                                                                                                                                                                                                                                                                                                                                |
| Trimetazidine | Although no single pharmacological mechanism has been universally accepted, trimetazidine is known to target deranged cellular energetics, particularly in ischaemic myocardial tissue. In persons with diabetes, trimetazidine improves HbA1c and glycaemia. <sup>143,144</sup>                                                                                                                                                                                                                                                                                                                                                                                                                                                          |

© ESC 2019

ATP = adenosine triphosphate; AV = atrioventricular; BP = blood pressure; CCB = calcium channel blocker; DHP = dihydropyridine; HbA1c = glycated haemoglobin.

**Supplementary Table 3 Major side effects, contraindications, drug–drug interactions, and precautions of anti-ischaemic drugs**

| Drug class                                             | Side effects <sup>a</sup>                                                                                                                                                                                                                                                                                                   | Contraindications                                                                                                                                                                                                                                                                                                                                                                                         | DDIs                                                                                                                                                   | Precautions                                                                                                                                 |
|--------------------------------------------------------|-----------------------------------------------------------------------------------------------------------------------------------------------------------------------------------------------------------------------------------------------------------------------------------------------------------------------------|-----------------------------------------------------------------------------------------------------------------------------------------------------------------------------------------------------------------------------------------------------------------------------------------------------------------------------------------------------------------------------------------------------------|--------------------------------------------------------------------------------------------------------------------------------------------------------|---------------------------------------------------------------------------------------------------------------------------------------------|
| Short- and long-acting nitrates <sup>138,145,146</sup> | <ul style="list-style-type: none"> <li>● Headache</li> <li>● Flushing</li> <li>● Hypotension</li> <li>● Syncope and postural hypotension</li> <li>● Reflex tachycardia</li> <li>● Methaemoglobinaemia</li> </ul>                                                                                                            | <ul style="list-style-type: none"> <li>● Hypertrophic obstructive cardiomyopathy</li> <li>● Severe aortic stenosis</li> <li>● PDE5 inhibitors</li> </ul>                                                                                                                                                                                                                                                  | <ul style="list-style-type: none"> <li>● PDE5 inhibitors (sildenafil or similar drugs)</li> <li>● Alpha-adrenergic blockers</li> <li>● CCBs</li> </ul> | <ul style="list-style-type: none"> <li>● Allow a nitrate-free or nitrate-low interval of about 10–14 h with long-acting nitrates</li> </ul> |
| Beta-blockers <sup>b 147,148</sup>                     | <ul style="list-style-type: none"> <li>● Fatigue, depression</li> <li>● Bradycardia</li> <li>● Heart block</li> <li>● Decreased inotropism</li> <li>● Bronchospasm</li> <li>● Peripheral vasoconstriction</li> <li>● Postural hypotension</li> <li>● Impotence</li> <li>● Hypoglycaemia/mask hypoglycaemia signs</li> </ul> | <ul style="list-style-type: none"> <li>● Low heart rate or heart conduction disorder</li> <li>● Cardiogenic shock</li> <li>● Asthma</li> <li>● COPD caution; may use beta<sub>1</sub>-selective blockers if fully treated by inhaled steroids and long-acting beta-agonists</li> <li>● Severe peripheral vascular disease</li> <li>● Decompensated heart failure</li> <li>● Vasospastic angina</li> </ul> | <ul style="list-style-type: none"> <li>● Heart rate-lowering CCBs</li> <li>● Sinus node or atrioventricular conduction depressors</li> </ul>           | <ul style="list-style-type: none"> <li>● Diabetes</li> <li>● COPD</li> </ul>                                                                |

Continued

**Supplementary Table 3** *Continued*

| Drug class                                                              | Side effects <sup>a</sup>                                                                                                                                                                                      | Contraindications                                                                                                                                                                                                                                              | DDIs                                                                                                                                                                           | Precautions                                                                                                                                                                                                                                |
|-------------------------------------------------------------------------|----------------------------------------------------------------------------------------------------------------------------------------------------------------------------------------------------------------|----------------------------------------------------------------------------------------------------------------------------------------------------------------------------------------------------------------------------------------------------------------|--------------------------------------------------------------------------------------------------------------------------------------------------------------------------------|--------------------------------------------------------------------------------------------------------------------------------------------------------------------------------------------------------------------------------------------|
| CCBs <sup>146,147</sup> [heart rate-lowering (diltiazem and verapamil)] | <ul style="list-style-type: none"> <li>● Bradycardia</li> <li>● Heart conduction defect</li> <li>● Decreased inotropism</li> <li>● Constipation</li> <li>● Gingival hyperplasia</li> </ul>                     | <ul style="list-style-type: none"> <li>● Low heart rate or heart rhythm disorder</li> <li>● Sick sinus syndrome</li> <li>● Congestive heart failure</li> </ul>                                                                                                 | <ul style="list-style-type: none"> <li>● Negative inotropes (beta-blockers, sodium channel blockers)</li> <li>● Bradycardic drugs</li> <li>● CYP3A4 substrates</li> </ul>      | <ul style="list-style-type: none"> <li>● Low BP</li> </ul>                                                                                                                                                                                 |
| CCBs <sup>138,147</sup> (dihydropyridines)                              | <ul style="list-style-type: none"> <li>● Headache</li> <li>● Ankle swelling</li> <li>● Fatigue</li> <li>● Flushing</li> <li>● Reflex tachycardia</li> <li>● Gingival hyperplasia</li> </ul>                    | <ul style="list-style-type: none"> <li>● Cardiogenic shock</li> <li>● Severe aortic stenosis</li> <li>● Obstructive cardiomyopathy</li> <li>● Low BP</li> </ul>                                                                                                | <ul style="list-style-type: none"> <li>● CYP3A4 substrates</li> </ul>                                                                                                          | <ul style="list-style-type: none"> <li>● Hepatic impairment</li> </ul>                                                                                                                                                                     |
| Ivabradine <sup>149,150</sup>                                           | <ul style="list-style-type: none"> <li>● Visual disturbances (phosphenes)</li> <li>● Headache, dizziness</li> <li>● Bradycardia</li> <li>● Atrial fibrillation</li> <li>● Heart block</li> </ul>               | <ul style="list-style-type: none"> <li>● Heart rate &lt;70 b.p.m.</li> <li>● Acute myocardial infarction</li> <li>● Severe hepatic disease</li> </ul>                                                                                                          | <ul style="list-style-type: none"> <li>● QTc-prolonging drugs</li> <li>● Combination with strong CYP450 or CYP3A4 inhibitors</li> </ul>                                        | <ul style="list-style-type: none"> <li>● Age &gt;75 years</li> <li>● Severe renal failure</li> <li>● Combination with verapamil or diltiazem</li> <li>● Not to be used in patients with tachyarrhythmias</li> </ul>                        |
| Nicorandil <sup>146,151</sup>                                           | <ul style="list-style-type: none"> <li>● Headache</li> <li>● Flushing</li> <li>● Dizziness, weakness</li> <li>● Nausea</li> <li>● Hypotension</li> <li>● Oral, anal, or gastrointestinal ulceration</li> </ul> | <ul style="list-style-type: none"> <li>● PDE5 inhibitors</li> <li>● Cardiogenic shock</li> <li>● Acute heart failure</li> <li>● Low BP</li> </ul>                                                                                                              | <ul style="list-style-type: none"> <li>● PDE5 inhibitors (sildenafil or similar drugs)</li> </ul>                                                                              | <ul style="list-style-type: none"> <li>● Non-steroidal anti-inflammatory drugs are not advised in association with nicorandil</li> </ul>                                                                                                   |
| Trimetazidine <sup>152,153</sup>                                        | <ul style="list-style-type: none"> <li>● Movement disorders</li> <li>● Gastric discomfort</li> <li>● Nausea</li> <li>● Rash, pruritus, or urticaria</li> <li>● Headache</li> </ul>                             | <ul style="list-style-type: none"> <li>● Allergy</li> <li>● Parkinson's disease</li> <li>● Tremors and movement disorders</li> <li>● Severe renal impairment</li> </ul>                                                                                        | <ul style="list-style-type: none"> <li>● None reported</li> </ul>                                                                                                              | <ul style="list-style-type: none"> <li>● Moderate renal impairment</li> <li>● Elderly</li> </ul>                                                                                                                                           |
| Ranolazine <sup>154,155</sup>                                           | <ul style="list-style-type: none"> <li>● Dizziness</li> <li>● Constipation</li> <li>● Nausea</li> <li>● Asthenia</li> <li>● QT prolongation</li> </ul>                                                         | <ul style="list-style-type: none"> <li>● Liver cirrhosis</li> <li>● Severe renal impairment</li> <li>● Moderate or severe hepatic impairment</li> <li>● Potent CYP3A4 inhibitors</li> <li>● Class Ia or III antiarrhythmics (other than amiodarone)</li> </ul> | <ul style="list-style-type: none"> <li>● CYP450 substrates (digoxin, simvastatin, and cyclosporine) and inhibitors (including CCBs)</li> <li>● QTc-prolonging drugs</li> </ul> | <p>Careful dose titration in patients with:</p> <ul style="list-style-type: none"> <li>● Mild-to-moderate renal impairment</li> <li>● Mild hepatic impairment</li> <li>● Concomitant treatment with CYP3A4 and P-gp inhibitors</li> </ul>  |
| Allopurinol <sup>156,157</sup>                                          | <ul style="list-style-type: none"> <li>● Rash</li> <li>● Gastric discomfort</li> </ul>                                                                                                                         | <ul style="list-style-type: none"> <li>● Hypersensitivity</li> </ul>                                                                                                                                                                                           | <ul style="list-style-type: none"> <li>● Mercaptopurine/azathioprine</li> </ul>                                                                                                | <ul style="list-style-type: none"> <li>● Severe renal failure</li> <li>● Consider genotyping for HLA-B*5801 allele in Asians</li> <li>● Discontinue at the first appearance of skin rash or other signs of an allergic reaction</li> </ul> |

This list is not exhaustive; refer to the relevant summary of product characteristics for details.

BP = blood pressure; b.p.m. = beats per minute; CCB = calcium channel blocker; COPD = chronic obstructive pulmonary disease; CR = controlled release; CYP = cytochrome P; DDI = drug-drug interaction; HLA = human leukocyte antigen; PDE5 = phosphodiesterase type 5; P-gp = P-glycoprotein.

<sup>a</sup>Very frequent or frequent; may vary according to specific drugs within the therapeutic class. Refer to the summary of product characteristics for more details.

<sup>b</sup>Atenolol, metoprolol CR, bisoprolol, and carvedilol.

**1.3.1 Event prevention**

Evaluation of bleeding risk is an important parameter that should be assessed in CCS patients with high ischaemic risk who might benefit from prolonged and/or intensified antithrombotic treatment. The PRECISE-DAPT (Predicting Bleeding Complication in Patients Undergoing Stent Implantation and Subsequent Dual Antiplatelet

Therapy) score was validated as a clinical tool to support treatment decisions in patients after stent implantation.<sup>157</sup>

Calculation of the PRECISE-DAPT score involves five items (Supplementary Figure 4), and the upper quartile score ( $\geq 25$ ) is associated with high bleeding risk while on dual antiplatelet treatment.

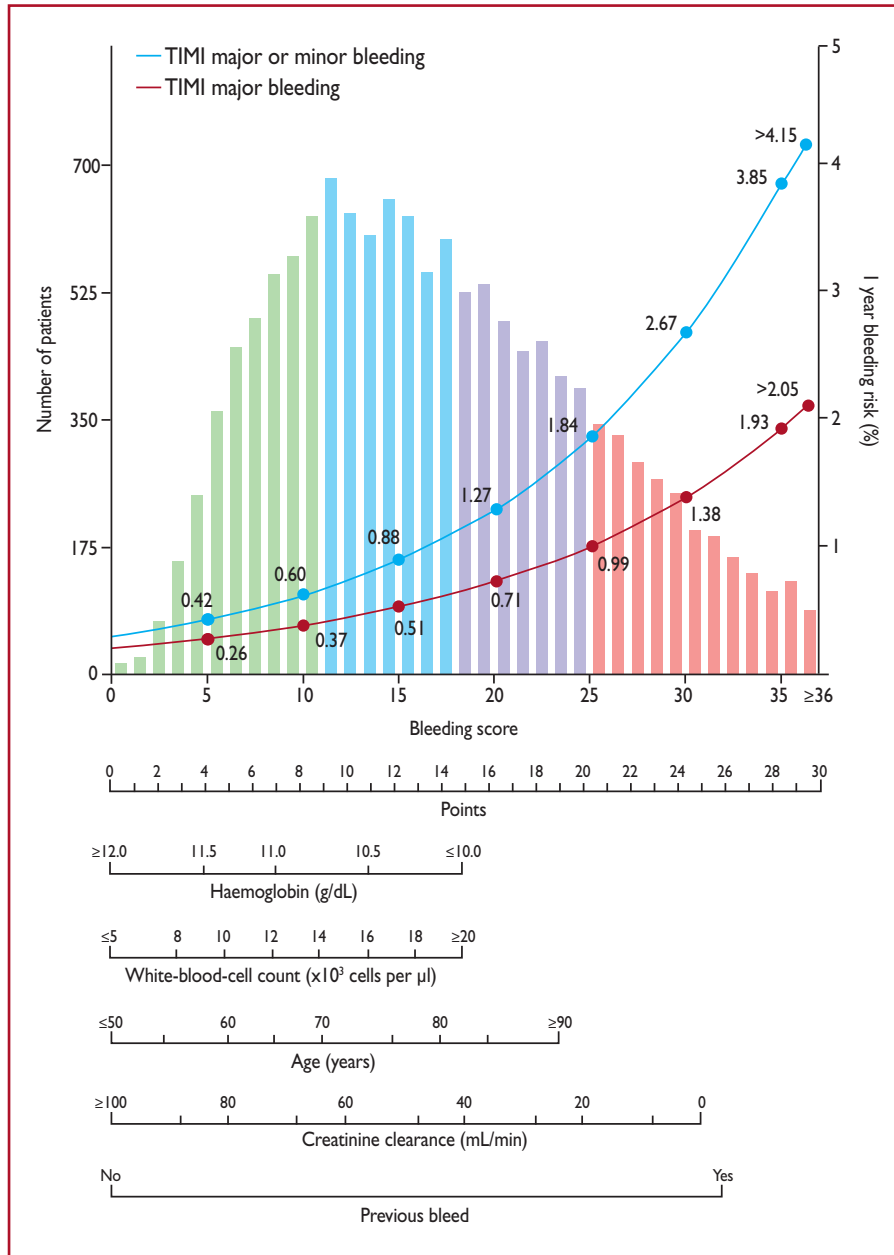

**Supplementary Figure 4** Nomogram for calculation of PRECISE-DAPT score. The upper quartile of the bleeding score ( $\geq 25$ ) identifies high risk for out-of-hospital TIMI major (red curve), and major or minor (blue curve), bleeding at 1 year post-percutaneous coronary intervention while on dual antiplatelet therapy. TIMI = thrombolysis in myocardial infarction.

## 1.4 Revascularization

**Supplementary Table 4** Characteristics and outcomes of randomized studies of percutaneous coronary intervention vs. medical therapy in patients with stable coronary artery disease

| Study                      | Year | n    | SCAD definition                                                                                                                                                                              | Women <sup>a</sup> | DM <sup>a</sup> | MVD <sup>a</sup> | CCS class II–IV | Comparison                                                                 | DES               | Follow-up          | Crossover from MT | Primary outcome (PCI vs. MT)                                     | Secondary outcomes                                                                                                                                                                                                                                                                                                                               |
|----------------------------|------|------|----------------------------------------------------------------------------------------------------------------------------------------------------------------------------------------------|--------------------|-----------------|------------------|-----------------|----------------------------------------------------------------------------|-------------------|--------------------|-------------------|------------------------------------------------------------------|--------------------------------------------------------------------------------------------------------------------------------------------------------------------------------------------------------------------------------------------------------------------------------------------------------------------------------------------------|
| COURAGE <sup>134</sup>     | 2007 | 2287 | ≥70% stenosis in ≥1 proximal epicardial coronary artery and objective evidence of myocardial ischemia, or ≥80% stenosis of ≥1 coronary artery and classic angina without provocative testing | 15%                | 35%             | 70%              | 56%             | PCI (with mostly POBA and BMS) and MT vs. MT                               | 3%                | 4.6 years (median) | 33%               | Death or MI: 19.0 vs. 18.5%; P=0.62                              | <ul style="list-style-type: none"> <li>No significant differences in: (i) death, MI, or stroke; (ii) rehospitalization for ACS; (iii) MI; (iv) death; (v) stroke; or (vi) death or non-procedural MI</li> <li>Less revascularization in the PCI+MT group and less angina throughout most of the follow-up period (but not at 5 years)</li> </ul> |
|                            |      |      |                                                                                                                                                                                              |                    |                 |                  |                 |                                                                            |                   |                    |                   |                                                                  |                                                                                                                                                                                                                                                                                                                                                  |
| COURAGE Extended follow-up | 2015 |      |                                                                                                                                                                                              |                    |                 |                  |                 |                                                                            |                   | 6.2 years (median) | NR                | Death: 25 vs. 24%; P=0.77                                        |                                                                                                                                                                                                                                                                                                                                                  |
| BARI 2D <sup>135</sup>     | 2009 | 2368 | ≥50% stenosis of a major epicardial coronary artery associated with a positive stress test, or ≥70% stenosis of a major epicardial coronary artery and classic angina                        | 30%                | 100%            | NR               | NR              | Revascularization by PCI (with mostly POBA and BMS) or CABG plus MT vs. MT | 35% (PCI stratum) | 5.3 years (mean)   | 42.1%             | Survival: 88.3 vs. 87.8%; P=0.97                                 | <ul style="list-style-type: none"> <li>No significant differences in death, MI, or stroke overall and with PCI vs. MT</li> <li>Less death, MI, or stroke, and less MI, with CABG vs. MT</li> </ul>                                                                                                                                               |
| FAME 2 <sup>73</sup>       | 2012 | 888  | At least one stenosis in a major epicardial coronary artery with an FFR ≤0.80                                                                                                                | 23%                | 27%             | 22%              | 67%             | PCI with second-generation DES plus MT vs. MT                              | 100%              | 7 months (mean)    | NR                | Death, MI, or urgent revascularization: 4.3 vs. 12.7%; P < 0.001 | <ul style="list-style-type: none"> <li>No significant differences in death and MI</li> <li>Less urgent, non-urgent, and any revascularization in the PCI group</li> </ul>                                                                                                                                                                        |

Continued

**Supplementary Table 4 Continued**

| Study                      | Year | n   | SCAD definition                                                                                                    | Women <sup>a</sup> | DM <sup>a</sup> | MVD <sup>a</sup> | CCS class II–IV | Comparison                                                        | DES  | Follow-up | Crossover from MT | Primary outcome (PCI vs. MT)                                                                             | Secondary outcomes                                                                                                                                                                                                                                                                                                                                                                                                                                                                   |
|----------------------------|------|-----|--------------------------------------------------------------------------------------------------------------------|--------------------|-----------------|------------------|-----------------|-------------------------------------------------------------------|------|-----------|-------------------|----------------------------------------------------------------------------------------------------------|--------------------------------------------------------------------------------------------------------------------------------------------------------------------------------------------------------------------------------------------------------------------------------------------------------------------------------------------------------------------------------------------------------------------------------------------------------------------------------------|
| FAME 22 year <sup>74</sup> | 2014 |     |                                                                                                                    |                    |                 |                  |                 |                                                                   |      | 2 years   | 41%               | Death, MI, or urgent revascularization: 8.1 vs. 19.5%; <i>P</i> < 0.001                                  | <ul style="list-style-type: none"> <li>Less angina in the PCI group</li> <li>No significant differences in death or MI</li> <li>Less death, MI, or urgent revascularization at 7 days in the MT group</li> <li>Less death or MI between 8 days and 2 years in the PCI group</li> <li>Less urgent revascularization at 2 years, and between 8 days and 2 years, in the PCI group (including urgent revascularization triggered by MI, ECG changes, or CCS class IV angina)</li> </ul> |
| ORBITA 136                 | 2017 | 200 | At least one angiographically significant lesion (≥70%) in a single vessel that was clinically appropriate for PCI | 24%                | 22%             | 0%               | 97%             | PCI with second-generation DES plus MT vs. sham procedure plus MT | 100% | 6 weeks   | 4%                | Exercise time increment between groups (PCI minus placebo 16.6 s, 95% CI: -8.9 to 42.0; <i>P</i> =0.20). | <ul style="list-style-type: none"> <li>No differences in angina frequency, angina stability, physical limitation, and quality of life</li> <li>Significant but trivially higher peak stress wall motion index score with PCI</li> </ul>                                                                                                                                                                                                                                              |

© ESC 2019

ACS = acute coronary syndrome; BARI 2D = Bypass Angioplasty Revascularization Investigation 2 Diabetes; BMS = bare-metal stent; CABG = coronary artery bypass grafting; CCS = Canadian Cardiovascular Society; CI = confidence interval; COURAGE = Clinical Outcomes Utilizing Revascularization and Aggressive Drug Evaluation; DES = drug-eluting stent; DM = diabetes mellitus; ECG = electrocardiogram; FAME 2 = Fractional Flow Reserve versus Angiography for Multivessel Evaluation 2; FFR = fractional flow reserve; MI = myocardial infarction; MT = medical therapy; MVD = multivessel disease; NR = not reported; ORBITA = Objective Randomised Blinded Investigation with optimal medical Therapy of Angioplasty in stable angina; PCI = percutaneous coronary intervention; POBA = plain old balloon angioplasty; SCAD = stable coronary artery disease.

<sup>a</sup>Proportions are reported for the control group.

## References

- Knuuti J, Ballo H, Juarez-Orozco LE, Saraste A, Kolh P, Rutjes AWS, Juni P, Windecker S, Bax JJ, Wijns W. The performance of non-invasive tests to rule-in and rule-out significant coronary artery stenosis in patients with stable angina: a meta-analysis focused on post-test disease probability. *Eur Heart J* 2018;**39**:3322–3330.
- Androulakis A, Aznaouridis KA, Aggeli CJ, Roussakis GN, Michaelides AP, Kartalis AN, Stougiannos PN, Dilaveris PE, Misovoulos PI, Stefanadis CI, Kallikazaros IE. Transient ST-segment depression during paroxysms of atrial fibrillation in otherwise normal individuals: relation with underlying coronary artery disease. *J Am Coll Cardiol* 2007;**50**:1909–1911.
- Pradhan R, Chaudhary A, Donato AA. Predictive accuracy of ST depression during rapid atrial fibrillation on the presence of obstructive coronary artery disease. *Am J Emerg Med* 2012;**30**:1042–1047.
- Froelicher VF, Lehmann KG, Thomas R, Goldman S, Morrison D, Edson R, Lavori P, Myers J, Dennis C, Shabetai R, Do D, Froning J. The electrocardiographic exercise test in a population with reduced workup bias: diagnostic performance, computerized interpretation, and multivariable prediction. Veterans Affairs Cooperative Study in Health Services #016 (QUEXTA) Study Group. Quantitative Exercise Testing and Angiography. *Ann Intern Med* 1998;**128**:965–974.
- Morise AP, Diamond GA. Comparison of the sensitivity and specificity of exercise electrocardiography in biased and unbiased populations of men and women. *Am Heart J* 1995;**130**:741–747.
- Belardinelli R, Lacalaprice F, Carle F, Minnucci A, Cianci G, Perna G, D'Eusanio G. Exercise-induced myocardial ischaemia detected by cardiopulmonary exercise testing. *Eur Heart J* 2003;**24**:1304–1313.
- Siontis GC, Mavridis D, Greenwood JP, Coles B, Nikolakopoulou A, Juni P, Salanti G, Windecker S. Outcomes of non-invasive diagnostic modalities for the detection of coronary artery disease: network meta-analysis of diagnostic randomised controlled trials. *BMJ* 2018;**360**:k504.
- Lubbers M, Dedic A, Coenen A, Galema T, Akkerhuis J, Bruning T, Krenning B, Musters P, Ouhlous M, Liem A, Niezen A, Hunink M, de Feijter P, Nieman K. Calcium imaging and selective computed tomography angiography in comparison to functional testing for suspected coronary artery disease: the multicentre, randomized CRESCENT trial. *Eur Heart J* 2016;**37**:1232–1243.
- Zacharias K, Ahmed A, Shah BN, Gurunathan S, Young G, Acosta D, Senior R. Relative clinical and economic impact of exercise echocardiography vs. exercise electrocardiography, as first line investigation in patients without known coronary artery disease and new stable angina: a randomized prospective study. *Eur Heart J Cardiovasc Imaging* 2017;**18**:195–202.
- Shaw LJ, Mieres JH, Hendel RH, Boden WE, Gulati M, Veledar E, Hachamovitch R, Arrighi JA, Merz CN, Gibbons RJ, Wenger NK, Heller GV; WOMEN Trial Investigators. Comparative effectiveness of exercise electrocardiography with or without myocardial perfusion single photon emission computed tomography in women with suspected coronary artery disease: results from the What Is the Optimal Method for Ischemia Evaluation in Women (WOMEN) trial. *Circulation* 2011;**124**:1239–1249.
- Sicari R, Nihoyannopoulos P, Evangelista A, Kasprzak J, Lancellotti P, Poldermans D, Voigt JU, Zamorano JL, European Association of Echocardiography. Stress echocardiography expert consensus statement—executive summary: European Association of Echocardiography (EAE) (a registered branch of the ESC). *Eur Heart J* 2009;**30**:278–289.
- Heijnenbroek-Kal MH, Fleischmann KE, Hunink MG. Stress echocardiography, stress single-photon-emission computed tomography and electron beam computed tomography for the assessment of coronary artery disease: a meta-analysis of diagnostic performance. *Am Heart J* 2007;**154**:415–423.
- Senior R, Becher H, Monaghan M, Agati L, Zamorano J, Vanoverschelde JL, Nihoyannopoulos P, Edvardsen T, Lancellotti P; EACVI Scientific Documents Committee for 2014–16 and 2016–18. Clinical practice of contrast echocardiography: recommendation by the European Association of Cardiovascular Imaging (EACVI) 2017. *Eur Heart J Cardiovasc Imaging* 2017;**18**:1205–1205af.
- Plana JC, Mikati IA, Dokainish H, Lakkis N, Abukhalil J, Davis R, Hetzell BC, Zoghbi WA. A randomized cross-over study for evaluation of the effect of image optimization with contrast on the diagnostic accuracy of dobutamine echocardiography in coronary artery disease: the OPTIMIZE trial. *JACC Cardiovasc Imaging* 2008;**1**:145–152.
- Bjork Ingul C, Stoylen A, Slordahl SA, Wiseth R, Burgess M, Marwick TH. Automated analysis of myocardial deformation at dobutamine stress echocardiography: an angiographic validation. *J Am Coll Cardiol* 2007;**49**:1651–1659.
- Mor-Avi V, Lang RM, Badano LP, Belohlavek M, Cardim NM, Derumeaux G, Galderisi M, Marwick T, Nagueh SF, Sengupta PP, Sicari R, Smiseth OA, Smulevitz B, Takeuchi M, Thomas JD, Vannan M, Voigt JU, Zamorano JL. Current and evolving echocardiographic techniques for the quantitative evaluation of cardiac mechanics: ASE/EAE consensus statement on methodology and indications endorsed by the Japanese Society of Echocardiography. *Eur J Echocardiogr* 2011;**12**:167–205.
- Yang HS, Pellikka PA, McCully RB, Oh JK, Kukulzke JA, Khandheria BK, Chandrasekaran K. Role of biplane and biplane echocardiographically guided 3-dimensional echocardiography during dobutamine stress echocardiography. *J Am Soc Echocardiogr* 2006;**19**:1136–1143.
- Yoshitani H, Takeuchi M, Mor-Avi V, Otsuji Y, Hozumi T, Yoshiyama M. Comparative diagnostic accuracy of multiplane and multislice three-dimensional dobutamine stress echocardiography in the diagnosis of coronary artery disease. *J Am Soc Echocardiogr* 2009;**22**:437–442.
- Zwas DR, Takuma S, Mullis-Jansson S, Fard A, Chaudhry H, Wu H, Di Tullio MR, Homma S. Feasibility of real-time 3-dimensional treadmill stress echocardiography. *J Am Soc Echocardiogr* 1999;**12**:285–289.
- Vamvakidou A, Gurunathan S, Senior R. Novel techniques in stress echocardiography: a focus on the advantages and disadvantages. *Expert Rev Cardiovasc Ther* 2016;**14**:477–494.
- Gurunathan S, Zacharias K, Akhtar M, Ahmed A, Mehta V, Karogiannis N, Vamvakidou A, Khatrar R, Senior R. Cost-effectiveness of a management strategy based on exercise echocardiography versus exercise electrocardiography in patients presenting with suspected angina during long term follow up: a randomized study. *Int J Cardiol* 2018;**259**:1–7.
- Verberne HJ, Acampa W, Anagnostopoulos C, Ballinger J, Bengel F, De Bondt P, Buechel RR, Cuocolo A, van Eck-Smit BL, Flotats A, Hacker M, Hindorf C, Kaufmann PA, Lindner O, Ljungberg M, Lonsdale M, Manrique A, Minarik D, Scholte AJ, Slart RH, Tragardh E, de Wit TC, Hesse B, European Association of Nuclear Medicine (EANM). EANM procedural guidelines for radionuclide myocardial perfusion imaging with SPECT and SPECT/CT: 2015 revision. *Eur J Nucl Med Mol Imaging* 2015;**42**:1929–1940.
- Knuuti J, Bengel F, Bax JJ, Kaufmann PA, Le Guludec D, Perrone Filardi P, Marcassa C, Ajmone Marsan N, Achenbach S, Kitsiou A, Flotats A, Eeckhout E, Minn H, Hesse B. Risks and benefits of cardiac imaging: an analysis of risks related to imaging for coronary artery disease. *Eur Heart J* 2014;**35**:633–638.
- Takx RA, Blomberg BA, El Aidi H, Habets J, de Jong PA, Nagel E, Hoffmann U, Leiner T. Diagnostic accuracy of stress myocardial perfusion imaging compared to invasive coronary angiography with fractional flow reserve meta-analysis. *Circ Cardiovasc Imaging* 2015;**8**:e002666.
- Tragardh E, Tan SS, Bucnerius J, Gimelli A, Gaemperli O, Lindner O, Agostini D, Ubleis C, Scagra R, Slart RH, Underwood SR, Hyafil F, Hacker M, Verberne HJ. Systematic review of cost-effectiveness of myocardial perfusion scintigraphy in patients with ischaemic heart disease: a report from the cardiovascular committee of the European Association of Nuclear Medicine. Endorsed by the European Association of Cardiovascular Imaging. *Eur Heart J Cardiovasc Imaging* 2017;**18**:825–832.
- Scagra R, Passeri A, Bucnerius J, Verberne HJ, Slart RH, Lindner O, Gimelli A, Hyafil F, Agostini D, Ubleis C, Hacker M, Cardiovascular Committee of the European Association of Nuclear Medicine (EANM). Clinical use of quantitative cardiac perfusion PET: rationale, modalities and possible indications. Position paper of the Cardiovascular Committee of the European Association of Nuclear Medicine (EANM). *Eur J Nucl Med Mol Imaging* 2016;**43**:1530–1545.
- Mc Ardlle BA, Dowsley TF, deKemp RA, Wells GA, Beanlands RS. Does rubidium-82 PET have superior accuracy to SPECT perfusion imaging for the diagnosis of obstructive coronary disease?: a systematic review and meta-analysis. *J Am Coll Cardiol* 2012;**60**:1828–1837.
- Jaarsma C, Leiner T, Bekkers SC, Crijs HJ, Wildberger JE, Nagel E, Nelemans PJ, Schalla S. Diagnostic performance of noninvasive myocardial perfusion imaging using single-photon emission computed tomography, cardiac magnetic resonance, and positron emission tomography imaging for the detection of obstructive coronary artery disease: a meta-analysis. *J Am Coll Cardiol* 2012;**59**:1719–1728.
- Danad I, Rajmakers PG, Driessen RS, Leipsic J, Raju R, Naoum C, Knuuti J, Maki M, Underwood RS, Min JK, Elmore K, Stuijzand WJ, van Royen N, Tulevski I, Somsen AG, Huisman MC, van Lingem AA, Heymans MW, van de Ven PM, van Kuijk C, Lammertsma AA, van Rossum AC, Knaapen P. Comparison of coronary CT angiography, SPECT, PET, and hybrid imaging for diagnosis of ischemic heart disease determined by fractional flow reserve. *JAMA Cardiol* 2017;**2**:1100–1107.
- Bateman TM, Heller GV, McGhie AI, Friedman JD, Case JA, Bryngelson JR, Hertenstein GK, Moutray KL, Reid K, Cullom SJ. Diagnostic accuracy of rest/stress ECG-gated Rb-82 myocardial perfusion PET: comparison with ECG-gated Tc-99m sestamibi SPECT. *J Nucl Cardiol* 2006;**13**:24–33.
- Kajander SA, Joutsiniemi E, Saraste M, Pietilä M, Ukkonen H, Saraste A, Sipilä HT, Teräs M, Mäki M, Airaksinen J, Hartiala J, Knuuti J. Clinical value of absolute quantification of myocardial perfusion with (15)O-water in coronary artery disease. *Circ Cardiovasc Imaging* 2011;**4**:678–684.

32. Fiechter M, Ghadri JR, Gebhard C, Fuchs TA, Pazhenkottil AP, Nkoulou RN, Herzog BA, Wyss CA, Gaemperli O, Kaufmann PA. Diagnostic value of 13N-ammonia myocardial perfusion PET: added value of myocardial flow reserve. *J Nucl Med* 2012;**53**:1230–1234.
33. Ziadi MC, Dekemp RA, Williams K, Guo A, Renaud JM, Chow BJ, Klein R, Ruddy TD, Aung M, Garrard L, Beanlands RS. Does quantification of myocardial flow reserve using rubidium-82 positron emission tomography facilitate detection of multivessel coronary artery disease? *J Nucl Cardiol* 2012;**19**:670–680.
34. Naya M, Murthy VL, Taqueti VR, Foster CR, Klein J, Garber M, Dorbala S, Hainer J, Blankstein R, Resnic F, Di Carli MF. Preserved coronary flow reserve effectively excludes high-risk coronary artery disease on angiography. *J Nucl Med* 2014;**55**:248–255.
35. Le TT, Huang W, Bryant JA, Cook SA, Chin CW. Stress cardiovascular magnetic resonance imaging: current and future perspectives. *Expert Rev Cardiovasc Ther* 2017;**15**:181–189.
36. Wahl A, Paetsch I, Gollesch A, Roethemeyer S, Foell D, Gebker R, Langreck H, Klein C, Fleck E, Nagel E. Safety and feasibility of high-dose dobutamine-atropine stress cardiovascular magnetic resonance for diagnosis of myocardial ischaemia: experience in 1000 consecutive cases. *Eur Heart J* 2004;**25**:1230–1236.
37. van Dijk R, van Assen M, Vliegenthart R, de Bock GH, van der Harst P, Oudkerk M. Diagnostic performance of semi-quantitative and quantitative stress CMR perfusion analysis: a meta-analysis. *J Cardiovasc Magn Reson* 2017;**19**:92.
38. Li M, Zhou T, Yang LF, Peng ZH, Ding J, Sun G. Diagnostic accuracy of myocardial magnetic resonance perfusion to diagnose ischemic stenosis with fractional flow reserve as reference: systematic review and meta-analysis. *JACC Cardiovasc Imaging* 2014;**7**:1098–1105.
39. Bingham SE, Hachamovitch R. Incremental prognostic significance of combined cardiac magnetic resonance imaging, adenosine stress perfusion, delayed enhancement, and left ventricular function over preimaging information for the prediction of adverse events. *Circulation* 2011;**123**:1509–1518.
40. Wallace EL, Morgan TM, Walsh TF, Dall'Armellina E, Ntim W, Hamilton CA, Hundley WG. Dobutamine cardiac magnetic resonance results predict cardiac prognosis in women with known or suspected ischemic heart disease. *JACC Cardiovasc Imaging* 2009;**2**:299–307.
41. Klem I, Greulich S, Heitner JF, Kim H, Vogelsberg H, Kispert EM, Ambati SR, Bruch C, Parker M, Judd RM, Kim RJ, Sechtem U. Value of cardiovascular magnetic resonance stress perfusion testing for the detection of coronary artery disease in women. *JACC Cardiovasc Imaging* 2008;**1**:436–445.
42. Abbara S, Blanke P, Maroules CD, Cheezum M, Choi AD, Han BK, Marwan M, Naoum C, Norgaard BL, Rubinshtein R, Schoenhagen P, Villines T, Leipsic J. SCCT guidelines for the performance and acquisition of coronary computed tomographic angiography: a report of the society of Cardiovascular Computed Tomography Guidelines Committee: Endorsed by the North American Society for Cardiovascular Imaging (NASCI). *J Cardiovasc Comput Tomogr* 2016;**10**:435–449.
43. Genders TS, Steyerberg EW, Hunink MG, Nieman K, Galema TW, Mollet NR, de Feyter PJ, Krestin GP, Alkadi H, Leschka S, Desbiolles L, Meijs MF, Cramer MJ, Knuuti J, Kajander S, Bogaert J, Goetschalckx K, Cademartiri F, Maffei E, Martini C, Seitun S, Aldrovandi A, Wildermuth S, Stinn B, Fornaro J, Feuchtnr G, De Zordo T, Auer T, Plank F, Friedrich G, Pugliese F, Petersen SE, Davies LC, Schoepf UJ, Rowe GW, van Mieghem CA, van Driessche L, Sinitsyn V, Gopalan D, Nikolaou K, Bamberg F, Cury RC, Battle J, Maurovich-Horvat P, Bartykowszki A, Merkely B, Becker D, Hadamitzky M, Hausleiter J, Dewey M, Zimmermann E, Laule M. Prediction model to estimate presence of coronary artery disease: retrospective pooled analysis of existing cohorts. *BMJ* 2012;**344**:e3485.
44. Menke J, Kowalski J. Diagnostic accuracy and utility of coronary CT angiography with consideration of unevaluable results: a systematic review and multivariate Bayesian random-effects meta-analysis with intention to diagnose. *Eur Radiol* 2016;**26**:451–458.
45. Hadamitzky M, Freissmuth B, Meyer T, Hein F, Kastrati A, Martinoff S, Schomig A, Hausleiter J. Prognostic value of coronary computed tomographic angiography for prediction of cardiac events in patients with suspected coronary artery disease. *JACC Cardiovasc Imaging* 2009;**2**:404–411.
46. Min JK, Dunning A, Lin FY, Achenbach S, Al-Mallah M, Budoff MJ, Cademartiri F, Callister TQ, Chang HJ, Cheng V, Chinnaiyan K, Chow BJ, Delago A, Hadamitzky M, Hausleiter J, Kaufmann P, Maffei E, Raff G, Shaw LJ, Villines T, Berman DS; CONFIRM Investigators. Age- and sex-related differences in all-cause mortality risk based on coronary computed tomography angiography findings results from the International Multicenter CONFIRM (Coronary CT Angiography Evaluation for Clinical Outcomes: An International Multicenter Registry) of 23,854 patients without known coronary artery disease. *J Am Coll Cardiol* 2011;**58**:849–860.
47. Douglas PS, Hoffmann U, Patel MR, Mark DB, Al-Khalidi HR, Cavanaugh B, Cole J, Dolor RJ, Fordyce CB, Huang M, Khan MA, Kosinski AS, Krucoff MW, Malhotra V, Picard MH, Udelson JE, Velazquez EJ, Yow E, Cooper LS, Lee KL; PROMISE Investigators. Outcomes of anatomical versus functional testing for coronary artery disease. *N Engl J Med* 2015;**372**:1291–1300.
48. SCOT-HEART investigators, Newby DE, Adamson PD, Berry C, Boon NA, Dweck MR, Flather M, Forbes J, Hunter A, Lewis S, MacLean S, Mills NL, Norrie J, Roditi G, Shah ASV, Timmis AD, van Beek EJ, Williams MC. Coronary CT angiography and 5-year risk of myocardial infarction. *N Engl J Med* 2018;**379**:924–933.
49. Lu MT, Meyersohn NM, Mayrhofer T, Bittner DO, Emami H, Puchner SB, Foldyna B, Mueller ME, Hearne S, Yang C, Achenbach S, Truong QA, Ghoshhajra BB, Patel MR, Ferencik M, Douglas PS, Hoffmann U. Central core laboratory versus site interpretation of coronary CT angiography: agreement and association with cardiovascular events in the PROMISE Trial. *Radiology* 2018;**287**:87–95.
50. Norgaard BL, Leipsic J, Gaur S, Seneviratne S, Ko BS, Ito H, Jensen JM, Mauri L, De Bruyne B, Bezerra H, Osawa K, Marwan M, Naber C, Erglis A, Park SJ, Christiansen EH, Kaltoft A, Lassen JF, Botker HE, Achenbach S; NXT Trial Study Group. Diagnostic performance of noninvasive fractional flow reserve derived from coronary computed tomography angiography in suspected coronary artery disease: the NXT trial (Analysis of Coronary Blood Flow Using CT Angiography: Next Steps). *J Am Coll Cardiol* 2014;**63**:1145–1155.
51. George RT, Mehra VC, Chen MY, Kitagawa K, Arbab-Zadeh A, Miller JM, Matheson MB, Vavere AL, Kofoed KF, Rochitte CE, Dewey M, Yaw TS, Niinuma H, Brenner W, Cox C, Clouse ME, Lima JA, Di Carli M. Myocardial CT perfusion imaging and SPECT for the diagnosis of coronary artery disease: a head-to-head comparison from the CORE320 multicenter diagnostic performance study. *Radiology* 2014;**272**:407–416.
52. Norgaard BL, Hjort J, Gaur S, Hansson N, Botker HE, Leipsic J, Mathiassen ON, Grove EL, Pedersen K, Christiansen EH, Kaltoft A, Gormsen LC, Maeng M, Terkelsen CJ, Kristensen SD, Krusell LR, Jensen JM. Clinical use of coronary CTA-derived FFR for decision-making in stable CAD. *JACC Cardiovasc Imaging* 2017;**10**:541–550.
53. Douglas PS, De Bruyne B, Pontone G, Patel MR, Norgaard BL, Byrne RA, Curzen N, Purcell I, Gutberlet M, Rioufol G, Hink U, Schuchlenz HW, Feuchtnr G, Gilard M, Andreini D, Jensen JM, Hadamitzky M, Chiswell K, Cyr D, Wilk A, Wang F, Rogers C, Hlatky MA; PLATFORM Investigators. 1-year outcomes of FFRCT-guided care in patients with suspected coronary disease: the PLATFORM study. *J Am Coll Cardiol* 2016;**68**:435–445.
54. Lu MT, Ferencik M, Roberts RS, Lee KL, Ivanov A, Adami E, Mark DB, Jaffer FA, Leipsic JA, Douglas PS, Hoffmann U. Noninvasive FFR derived from coronary CT angiography: management and outcomes in the PROMISE trial. *JACC Cardiovasc Imaging* 2017;**10**:1350–1358.
55. Norgaard BL, Terkelsen CJ, Mathiassen ON, Grove EL, Botker HE, Parner E, Leipsic J, Steffensen FH, Riis AH, Pedersen K, Christiansen EH, Maeng M, Krusell LR, Kristensen SD, Eftekhari A, Jakobsen L, Jensen JM. Coronary CT angiographic and flow reserve-guided management of patients with stable ischemic heart disease. *J Am Coll Cardiol* 2018;**72**:2123–2134.
56. Sand NPR, Veien KT, Nielsen SS, Norgaard BL, Larsen P, Johansen A, Hess S, Deibjerg L, Husain M, Junker A, Thomsen KK, Rohold A, Jensen LO. Prospective comparison of FFR derived from coronary CT angiography with SPECT perfusion imaging in stable coronary artery disease: the ReASSESS study. *JACC Cardiovasc Imaging* 2018;**11**:1640–1650.
57. Collet C, Onuma Y, Andreini D, Sonck J, Pompilio G, Mushtaq S, La Meir M, Miyazaki Y, de Mey J, Gaemperli O, Ouda A, Maureira JP, Mandry D, Camenzind E, Macron L, Doenst T, Teichgraber U, Sigusch H, Asano T, Katagiri Y, Morel MA, Lindeboom W, Pontone G, Luscher TF, Bartorelli AL, Serruys PW. Coronary computed tomography angiography for heart team decision-making in multivessel coronary artery disease. *Eur Heart J* 2018;**39**:3689–3698.
58. Collet C, Miyazaki Y, Ryan N, Asano T, Tenekecioglu E, Sonck J, Andreini D, Sabate M, Brugaletta S, Stables RH, Bartorelli A, de Winter RJ, Katagiri Y, Chichareon P, De Maria GL, Suwannasom P, Cavalcante R, Jonker H, Morel MA, Cosyns B, Kappetein AP, Taggart DT, Farooq V, Escaned J, Banning A, Onuma Y, Serruys PW. Fractional flow reserve derived from computed tomographic angiography in patients with multivessel CAD. *J Am Coll Cardiol* 2018;**71**:2756–2769.
59. Rizvi A, Han D, Danad I, OH B, Lee JH, Gransar H, Stuijffand WJ, Roudsari HM, Park MW, Szymonifka J, Chang HJ, Jones EC, Knaepen P, Lin FY, Min JK, Pena JM. Diagnostic performance of hybrid cardiac imaging methods for assessment of obstructive coronary artery disease compared with stand-alone coronary computed tomography angiography: a meta-analysis. *JACC Cardiovasc Imaging* 2018;**11**:589–599.
60. Nissen L, Winther S, Westra J, Ejlersen JA, Isaksen C, Rossi A, Holm NR, Urbanovicene G, Gormsen LC, Madsen LH, Christiansen EH, Maeng M, Knudsen LL, Frost L, Brix L, Botker HE, Petersen SE, Bottcher M. Diagnosing coronary artery disease after a positive coronary computed tomography angiography: the Dan-NICAD open label, parallel, head to head, randomized controlled diagnostic accuracy trial of cardiovascular magnetic resonance and myocardial perfusion scintigraphy. *Eur Heart J Cardiovasc Imaging* 2018;**19**:369–377.



61. Pijls NH, De Bruyne B, Peels K, Van Der Voort PH, Bonnier HJ, Bartunek JKJ, Koolen JJ. Measurement of fractional flow reserve to assess the functional severity of coronary-artery stenoses. *N Engl J Med* 1996;**334**:1703–1708.
62. Layland J, Rauhalammi S, Watkins S, Ahmed N, McClure J, Lee MM, Carrick D, O'Donnell A, Sood A, Petrie MC, May VT, Eteiba H, Lindsay M, McEntegart M, Oldroyd KG, Radjenovic A, Berry C. Assessment of fractional flow reserve in patients with recent non-ST-segment-elevation myocardial infarction: comparative study with 3-T stress perfusion cardiac magnetic resonance imaging. *Circ Cardiovasc Interv* 2015;**8**:e002207.
63. Marques KM, Knaepen P, Boellaard R, Lammertsma AA, Westerhof N, Visser FC. Microvascular function in viable myocardium after chronic infarction does not influence fractional flow reserve measurements. *J Nucl Med* 2007;**48**:1987–1992.
64. Hwang D, Jeon KH, Lee JM, Park J, Kim CH, Tong Y, Zhang J, Bang JJ, Suh M, Paeng JC, Na SH, Cheon GJ, Cook CM, Davies JE, Koo BK. Diagnostic performance of resting and hyperemic invasive physiological indices to define myocardial ischemia: validation with (13)N-ammonia positron emission tomography. *JACC Cardiovasc Interv* 2017;**10**:751–760.
65. Johnson NP, Jeremias A, Zimmermann FM, Adjedj J, Witt N, Hennigan B, Koo BK, Maehara A, Matsumura M, Barbato E, Esposito G, Trimarco B, Rioufol G, Park SJ, Yang HM, Baptista SB, Chrysant GS, Leone AM, Berry C, De Bruyne B, Gould KL, Kirkeeide RL, Oldroyd KG, Pijls NHJ, Fearon WF. Continuum of vasodilator stress from rest to contrast medium to adenosine hyperemia for fractional flow reserve assessment. *JACC Cardiovasc Interv* 2016;**9**:757–767.
66. Jeremias A, Maehara A, Genereux P, Asrress KN, Berry C, De Bruyne B, Davies JE, Escaned J, Fearon WF, Gould KL, Johnson NP, Kirtane AJ, Koo BK, Marques KM, Nijjer S, Oldroyd KG, Petraco R, Piek JJ, Pijls NH, Redwood S, Siebes M, Spaan JAE, van 't Veer M, Mintz GS, Stone GW. Multicenter core laboratory comparison of the instantaneous wave-free ratio and resting Pd/Pa with fractional flow reserve: the RESOLVE study. *J Am Coll Cardiol* 2014;**63**:1253–1261.
67. Escaned J, Echavarría-Pinto M, García-García HM, van de Hoef TP, de Vries T, Kaul P, Raveendran G, Altman JD, Kurz HI, Brechtken J, Tulli M, Von Birgelen C, Schneider JE, Khashaba AA, Jeremias A, Baucum J, Moreno R, Meuwissen M, Mishkel G, van Geuns RJ, Levite H, Lopez-Palop R, Mayhew M, Serruys PW, Samady H, Piek JJ, Lerman A; ADVISE II Study Group. Prospective assessment of the diagnostic accuracy of instantaneous wave-free ratio to assess coronary stenosis relevance: results of ADVISE II international, multicenter study (ADenosine Vasodilator Independent Stenosis Evaluation II). *JACC Cardiovasc Interv* 2015;**8**:824–833.
68. Kobayashi Y, Johnson NP, Zimmermann FM, Witt N, Berry C, Jeremias A, Koo BK, Esposito G, Rioufol G, Park SJ, Nishi T, Choi DH, Oldroyd KG, Barbato E, Pijls NHJ, De Bruyne B, Fearon WF; CONTRAST Study Investigators. Agreement of the resting distal to aortic coronary pressure with the instantaneous wave-free ratio. *J Am Coll Cardiol* 2017;**70**:2105–2113.
69. Van't Veer M, Pijls NHJ, Hennigan B, Watkins S, Ali ZA, De Bruyne B, Zimmermann FM, van Nunen LX, Barbato E, Berry C, Oldroyd KG. Comparison of different diastolic resting indexes to iFR: are they all equal? *J Am Coll Cardiol* 2017;**70**:3088–3096.
70. Svenerud J, Ahn JM, Jeremias A, van 't Veer M, Gore A, Maehara A, Crowley A, Pijls NHJ, De Bruyne B, Johnson NP, Hennigan B, Watkins S, Berry C, Oldroyd KG, Park SJ, Ali ZA. Validation of a novel non-hyperaemic index of coronary artery stenosis severity: the Resting Full-cycle Ratio (VALIDATE RFR) study. *EuroIntervention* 2018;**14**:806–814.
71. Tonino PA, De Bruyne B, Pijls NH, Siebert U, Ikeno F, van 't Veer M, Klauss V, Manoharan G, Engstrom T, Oldroyd KG, Ver Lee PN, MacCarthy PA, Fearon WF; FAME Study Investigators. Fractional flow reserve versus angiography for guiding percutaneous coronary intervention. *N Engl J Med* 2009;**360**:213–224.
72. van Nunen LX, Zimmermann FM, Tonino PA, Barbato E, Baumbach A, Engstrom T, Klauss V, MacCarthy PA, Manoharan G, Oldroyd KG, Ver Lee PN, Van't Veer M, Fearon WF, De Bruyne B, Pijls NH; FAME Study Investigators. Fractional flow reserve versus angiography for guidance of PCI in patients with multivessel coronary artery disease (FAME): 5-year follow-up of a randomised controlled trial. *Lancet* 2015;**386**:1853–1860.
73. De Bruyne B, Pijls NH, Kalesan B, Barbato E, Tonino PA, Piroth Z, Jagic N, Mobius-Winkler S, Rioufol G, Witt N, Kala P, MacCarthy P, Engstrom T, Oldroyd KG, Mavromatis K, Manoharan G, Verlee P, Frobert O, Curzen T, Johnson JB, Juni P, Fearon WF; FAME 2 Trial Investigators. Fractional flow reserve-guided PCI versus medical therapy in stable coronary disease. *N Engl J Med* 2012;**367**:991–1001.
74. De Bruyne B, Fearon WF, Pijls NH, Barbato E, Tonino P, Piroth Z, Jagic N, Mobius-Winkler S, Rioufol G, Witt N, Kala P, MacCarthy P, Engstrom T, Oldroyd K, Mavromatis K, Manoharan G, Verlee P, Frobert O, Curzen T, Johnson JB, Limacher A, Nuesch E, Juni P; FAME 2 Trial Investigators. Fractional flow reserve-guided PCI for stable coronary artery disease. *N Engl J Med* 2014;**371**:1208–1217.
75. Xaplanteris P, Fournier S, Pijls NHJ, Fearon WF, Barbato E, Tonino PAL, Engstrom T, Kaab S, Dambrink JH, Rioufol G, Toth GG, Piroth Z, Witt N, Frobert O, Kala P, Linke A, Jagic N, Mates M, Mavromatis K, Samady H, Irimpen A, Oldroyd K, Campo G, Rothenbuhler M, Juni P, De Bruyne B; FAME 2 Investigators. Five-year outcomes with PCI guided by fractional flow reserve. *N Engl J Med* 2018;**379**:250–259.
76. Zimmermann FM, Omerovic E, Fournier S, Kelbaek H, Johnson NP, Rothenbuhler M, Xaplanteris P, Abdel-Wahab M, Barbato E, Hofsten DE, Tonino PAL, Boxma-de Klerk BM, Fearon WF, Kober L, Smits PC, De Bruyne B, Pijls NHJ, Juni P, Engstrom T. Fractional flow reserve-guided percutaneous coronary intervention vs. medical therapy for patients with stable coronary lesions: meta-analysis of individual patient data. *Eur Heart J* 2019;**40**:180–186.
77. Smits PC, Abdel-Wahab M, Neumann FJ, Boxma-de Klerk BM, Lunde K, Schotborgh CE, Piroth Z, Horak D, Włodarczak A, Ong PJ, Hambrecht R, Angeras O, Richardt G, Omerovic E; Compare-Acute Investigators. Fractional flow reserve-guided multivessel angioplasty in myocardial infarction. *N Engl J Med* 2017;**376**:1234–1244.
78. Engstrom T, Kelbaek H, Helqvist S, Hofsten DE, Klovgaard L, Holmvang L, Jorgensen E, Pedersen F, Saunamaki K, Clemmensen P, De Backer O, Ravkilde J, Tilsted HH, Villadsen AB, Aaroe J, Jensen SE, Raugaard B, Kober L; DANAMI-3—PRIMULTI Investigators. Complete revascularisation versus treatment of the culprit lesion only in patients with ST-segment elevation myocardial infarction and multivessel disease (DANAMI-3-PRIMULTI): an open-label, randomised controlled trial. *Lancet* 2015;**386**:665–671.
79. Davies JE, Sen S, Dehbi HM, Al-Lamee R, Petraco R, Nijjer SS, Bhandi R, Lehman SJ, Walters D, Sapontis J, Janssens L, Vrints CJ, Khashaba A, Laine M, Van Belle E, Krackhardt F, Bojara W, Going O, Harle T, Indolfi C, Niccoli G, Ribichini F, Tanaka N, Yokoi H, Takashima H, Kikuta Y, Erglis A, Vinhas H, Canas Silva P, Baptista SB, Alghamdi A, Hellig F, Koo BK, Nam CW, Shin ES, Doh JH, Brugaletta S, Alegria-Barrero E, Meuwissen M, Piek JJ, van Royen N, Sezer M, Di Mario C, Gerber RT, Malik IS, Sharp ASP, Talwar S, Tang K, Samady H, Altman J, Seto AH, Singh J, Jeremias A, Matsuo H, Kharbanda RK, Patel MR, Serruys P, Escaned J. Use of the instantaneous wave-free ratio or fractional flow reserve in PCI. *N Engl J Med* 2017;**376**:1824–1834.
80. Gotberg M, Christiansen EH, Gudmundsdottir IJ, Sandhall L, Danielewicz M, Jakobsen L, Olsson SE, Ohagen P, Olsson H, Omerovic E, Calais F, Lindroos P, Maeng M, Todt T, Venetsanos D, James SK, Karegren A, Nilsson M, Carlsson J, Hauer D, Jensen J, Karlsson AC, Panayi G, Erlinge D, Frobert O; iFR-SWEDEHEART Investigators. Instantaneous wave-free ratio versus fractional flow reserve to guide PCI. *N Engl J Med* 2017;**376**:1813–1823.
81. Patel MR, Calhoon JH, Dehmer GJ, Grantham JA, Maddox TM, Maron DJ, Smith PK. ACC/AATS/AHA/ASE/ASNC/SCAI/SCCT/STS 2017 appropriate use criteria for coronary revascularization in patients with stable ischemic heart disease: a report of the American College of Cardiology Appropriate Use Criteria Task Force, American Association for Thoracic Surgery, American Heart Association, American Society of Echocardiography, American Society of Nuclear Cardiology, Society for Cardiovascular Angiography and Interventions, Society of Cardiovascular Computed Tomography, and Society of Thoracic Surgeons. *J Am Coll Cardiol* 2017;**69**:2212–2241.
82. Lindholm D, Lindback J, Armstrong PW, Budaj A, Cannon CP, Granger CB, Hagstrom E, Held C, Koenig W, Ostlund O, Stewart RAH, Soffer J, White HD, de Winter RJ, Steg PG, Siegbahn A, Kleber ME, Dressel A, Grammer TB, Marz W, Wallentin L. Biomarker-based risk model to predict cardiovascular mortality in patients with stable coronary disease. *J Am Coll Cardiol* 2017;**70**:813–826.
83. Emond M, Mock MB, Davis KB, Fisher LD, Holmes DR Jr, Chaitman BR, Kaiser GC, Alderman E, Killip T III. Long-term survival of medically treated patients in the Coronary Artery Surgery Study (CASS) Registry. *Circulation* 1994;**90**:2645–2657.
84. Hachamovitch R, Rozanski A, Shaw LJ, Stone GW, Thomson LE, Friedman JD, Hayes SW, Cohen I, Germano G, Berman DS. Impact of ischaemia and scar on the therapeutic benefit derived from myocardial revascularization vs. medical therapy among patients undergoing stress-rest myocardial perfusion scintigraphy. *Eur Heart J* 2011;**32**:1012–1024.
85. Mahmarian JJ, Dakik HA, Filipchuk NG, Shaw LJ, Iskander SS, Ruddy TD, Keng F, Henzlova MJ, Allam A, Moye LA, Pratt CM; INSPIRE Investigators. An initial strategy of intensive medical therapy is comparable to that of coronary revascularization for suppression of scintigraphic ischemia in high-risk but stable survivors of acute myocardial infarction. *J Am Coll Cardiol* 2006;**48**:2458–2467.
86. Rihal CS, Davis KB, Kennedy JW, Gersh BJ. The utility of clinical, electrocardiographic, and roentgenographic variables in the prediction of left ventricular function. *Am J Cardiol* 1995;**75**:220–223.
87. Raymond I, Pedersen F, Steensgaard-Hansen F, Green A, Busch-Sorensen M, Tuxen C, Appel J, Jacobsen J, Atar D, Hildebrandt P. Prevalence of impaired left ventricular systolic function and heart failure in a middle aged and elderly urban population segment of Copenhagen. *Heart* 2003;**89**:1422–1429.

88. Buxton AE, Lee KL, Hafley GE, Pires LA, Fisher JD, Gold MR, Josephson ME, Lehmann MH, Prystowsky EN; MUSTT Investigators. Limitations of ejection fraction for prediction of sudden death risk in patients with coronary artery disease: lessons from the MUSTT study. *J Am Coll Cardiol* 2007;**50**:1150–1157.
89. Stanton T, Leano R, Marwick TH. Prediction of all-cause mortality from global longitudinal speckle strain: comparison with ejection fraction and wall motion scoring. *Circ Cardiovasc Imaging* 2009;**2**:356–364.
90. Haugaa KH, Grenne BL, Eek CH, Ersboll M, Valeur N, Svendsen JH, Florian A, Sjøli B, Brunvand H, Kober L, Voigt JU, Desmet W, Smiseth OA, Edvardsen T. Strain echocardiography improves risk prediction of ventricular arrhythmias after myocardial infarction. *JACC Cardiovasc Imaging* 2013;**6**:841–850.
91. Ersboll M, Valeur N, Mogensen UM, Andersen MJ, Møller JE, Velazquez EJ, Hassager C, Søgaard P, Kober L. Prediction of all-cause mortality and heart failure admissions from global left ventricular longitudinal strain in patients with acute myocardial infarction and preserved left ventricular ejection fraction. *J Am Coll Cardiol* 2013;**61**:2365–2373.
92. Gupta S, Rohatgi A, Ayers CR, Willis BL, Haskell WL, Khara A, Drazner MH, de Lemos JA, Berry JD. Cardiorespiratory fitness and classification of risk of cardiovascular disease mortality. *Circulation* 2011;**123**:1377–1383.
93. Gulati M, Black HR, Shaw LJ, Arnsdorf MF, Merz CN, Lauer MS, Marwick TH, Pandey DK, Wicklund RH, Thisted RA. The prognostic value of a nomogram for exercise capacity in women. *N Engl J Med* 2005;**353**:468–475.
94. Myers J, Prakash M, Froelicher V, Do D, Partington S, Atwood JE. Exercise capacity and mortality among men referred for exercise testing. *N Engl J Med* 2002;**346**:793–801.
95. Smulders MW, Jaarsma C, Nelemans PJ, Bekkers S, Bucerius J, Leiner T, Crijns H, Wildberger JE, Schalla S. Comparison of the prognostic value of negative non-invasive cardiac investigations in patients with suspected or known coronary artery disease—a meta-analysis. *Eur Heart J Cardiovasc Imaging* 2017;**18**:980–987.
96. Mark DB, Shaw L, Harrell FE Jr, Hlatky MA, Lee KL, Bengtson JR, McCants CB, Califf RM, Pryor DB. Prognostic value of a treadmill exercise score in outpatients with suspected coronary artery disease. *N Engl J Med* 1991;**325**:849–853.
97. Montalescot G, Sechtem U, Achenbach S, Andreotti F, Arden C, Budaj A, Bugiardini R, Crea F, Cuisset T, Di Mario C, Ferreira JR, Gersh BJ, Gitt AK, Hulot JS, Marx N, Opie LH, Pfisterer M, Prescott E, Ruschitzka F, Sabate M, Senior R, Taggart DP, van der Wall EE, Vrints CJ. 2013 ESC guidelines on the management of stable coronary artery disease: the Task Force on the management of stable coronary artery disease of the European Society of Cardiology. *Eur Heart J* 2013;**34**:2949–3003.
98. Schinkel AF, Bax JJ, Geleijnse ML, Boersma E, Elhendy A, Roelandt JR, Poldermans D. Noninvasive evaluation of ischaemic heart disease: myocardial perfusion imaging or stress echocardiography? *Eur Heart J* 2003;**24**:789–800.
99. Lin FY, Dunning AM, Narula J, Shaw LJ, Gransar H, Berman DS, Min JK. Impact of an automated multimodality point-of-order decision support tool on rates of appropriate testing and clinical decision making for individuals with suspected coronary artery disease: a prospective multicenter study. *J Am Coll Cardiol* 2013;**62**:308–316.
100. Marwick TH, Case C, Vasey C, Allen S, Short L, Thomas JD. Prediction of mortality by exercise echocardiography: a strategy for combination with the duke treadmill score. *Circulation* 2001;**103**:2566–2571.
101. Marwick TH, Mehta R, Arheart K, Lauer MS. Use of exercise echocardiography for prognostic evaluation of patients with known or suspected coronary artery disease. *J Am Coll Cardiol* 1997;**30**:83–90.
102. Smedsrud MK, Sarvari S, Haugaa KH, Gjesdal O, Orn S, Aaberge L, Smiseth OA, Edvardsen T. Duration of myocardial early systolic lengthening predicts the presence of significant coronary artery disease. *J Am Coll Cardiol* 2012;**60**:1086–1093.
103. Metz LD, Beattie M, Hom R, Redberg RF, Grady D, Fleischmann KE. The prognostic value of normal exercise myocardial perfusion imaging and exercise echocardiography: a meta-analysis. *J Am Coll Cardiol* 2007;**49**:227–237.
104. Shaw LJ, Hage FG, Berman DS, Hachamovitch R, Iskandrian A. Prognosis in the era of comparative effectiveness research: where is nuclear cardiology now and where should it be? *J Nucl Cardiol* 2012;**19**:1026–1043.
105. Shaw LJ, Berman DS, Picard MH, Friedrich MG, Kwong RY, Stone GW, Senior R, Min JK, Hachamovitch R, Scherrer-Crosbie M, Mieres JH, Marwick TH, Phillips LM, Chaudhry FA, Pellikka PA, Slomka P, Arai AE, Iskandrian AE, Bateman TM, Heller GV, Miller TD, Nagel E, Goyal A, Borges-Neto S, Boden WE, Reynolds HR, Hochman JS, Maron DJ, Douglas PS; National Institutes of Health/National Heart, Lung, and Blood Institute-Sponsored ISCHEMIA Trial Investigators. Comparative definitions for moderate-severe ischemia in stress nuclear, echocardiography, and magnetic resonance imaging. *JACC Cardiovasc Imaging* 2014;**7**:593–604.
106. Hachamovitch R, Hayes SW, Friedman JD, Cohen I, Berman DS. Comparison of the short-term survival benefit associated with revascularization compared with medical therapy in patients with no prior coronary artery disease undergoing stress myocardial perfusion single photon emission computed tomography. *Circulation* 2003;**107**:2900–2907.
107. ISCHEMIA Trial Research Group, Maron DJ, Hochman JS, O'Brien SM, Reynolds HR, Boden WE, Stone GW, Bangalore S, Spertus JA, Mark DB, Alexander KP, Shaw L, Berger JS, Ferguson TB Jr, Williams DO, Harrington RA, Rosenberg Y. International Study of Comparative Health Effectiveness with Medical and Invasive Approaches (ISCHEMIA) trial: rationale and design. *Am Heart J* 2018;**201**:124–135.
108. Dorbala S, Di Carli MF, Beanlands RS, Merhige ME, Williams BA, Veledar E, Chow BJ, Min JK, Pencina MJ, Berman DS, Shaw LJ. Prognostic value of stress myocardial perfusion positron emission tomography: results from a multicenter observational registry. *J Am Coll Cardiol* 2013;**61**:176–184.
109. Murthy VL, Naya M, Foster CR, Hainer J, Gaber M, Di Carli G, Blankstein R, Dorbala S, Sitek A, Pencina MJ, Di Carli MF. Improved cardiac risk assessment with noninvasive measures of coronary flow reserve. *Circulation* 2011;**124**:2215–2224.
110. Ziadi MC, Dekemp RA, Williams KA, Guo A, Chow BJ, Renaud JM, Ruddy TD, Sarveswaran N, Tee RE, Beanlands RS. Impaired myocardial flow reserve on rubidium-82 positron emission tomography imaging predicts adverse outcomes in patients assessed for myocardial ischemia. *J Am Coll Cardiol* 2011;**58**:740–748.
111. Herzog BA, Husmann L, Valenta I, Gaemperli O, Siegrist PT, Tay FM, Burkhard N, Wyss CA, Kaufmann PA. Long-term prognostic value of 13N-ammonia myocardial perfusion positron emission tomography added value of coronary flow reserve. *J Am Coll Cardiol* 2009;**54**:150–156.
112. Motwani M, Swoboda PP, Plein S, Greenwood JP. Role of cardiovascular magnetic resonance in the management of patients with stable coronary artery disease. *Heart* 2018;**104**:888–894.
113. Greenwood JP, Herzog BA, Brown JM, Everett CC, Nixon J, Bijsterveld P, Maredia N, Motwani M, Dickinson CJ, Ball SG, Plein S. Prognostic value of cardiovascular magnetic resonance and single-photon emission computed tomography in suspected coronary heart disease: long-term follow-up of a prospective, diagnostic accuracy cohort study. *Ann Intern Med* 2016;**165**:1–9.
114. Jahnke C, Nagel E, Gebker R, Kokocinski T, Kelle S, Manka R, Fleck E, Paetsch I. Prognostic value of cardiac magnetic resonance stress tests: adenosine stress perfusion and dobutamine stress wall motion imaging. *Circulation* 2007;**115**:1769–1776.
115. Lipinski MJ, McVey CM, Berger JS, Kramer CM, Salerno M. Prognostic value of stress cardiac magnetic resonance imaging in patients with known or suspected coronary artery disease: a systematic review and meta-analysis. *J Am Coll Cardiol* 2013;**62**:826–838.
116. Steel K, Broderick R, Gandla V, Larose E, Resnic F, Jerosch-Herold M, Brown KA, Kwong RY. Complementary prognostic values of stress myocardial perfusion and late gadolinium enhancement imaging by cardiac magnetic resonance in patients with known or suspected coronary artery disease. *Circulation* 2009;**120**:1390–1400.
117. Gargiulo P, Dellegratagli S, Bruzzese D, Savarese G, Scala O, Ruggiero D, D'Amore C, Paolillo S, Agostoni P, Bossone E, Soricelli A, Cuocolo A, Trimarco B, Perrone Filardi P. The prognostic value of normal stress cardiac magnetic resonance in patients with known or suspected coronary artery disease: a meta-analysis. *Circ Cardiovasc Imaging* 2013;**6**:574–582.
118. Klem I, Shah DJ, White RD, Pennell DJ, van Rossum AC, Regenfus M, Sechtem U, Schwartzman PR, Hunold P, Croisille P, Parker M, Judd RM, Kim RJ. Prognostic value of routine cardiac magnetic resonance assessment of left ventricular ejection fraction and myocardial damage: an international, multicenter study. *Circ Cardiovasc Imaging* 2011;**4**:610–619.
119. Carrick D, Haig C, Rauhalammi S, Ahmed N, Mordi I, McEntegart M, Petrie MC, Eteiba H, Hood S, Watkins S, Lindsay M, Mahrous A, Ford I, Tzemos N, Sattar N, Welsh P, Radjenovic A, Oldroyd KG, Berry C. Prognostic significance of infarct core pathology revealed by quantitative non-contrast in comparison with contrast cardiac magnetic resonance imaging in reperfused ST-elevation myocardial infarction survivors. *Eur Heart J* 2016;**37**:1044–1059.
120. Cheruvu C, Precious B, Naoum C, Blanke P, Ahmadi A, Soon J, Arepalli C, Gransar H, Achenbach S, Berman DS, Budoff MJ, Callister TQ, Al-Mallah MH, Cademartiri F, Chinnaiyan K, Rubinshtein R, Marquez H, DeLago A, Villines TC, Hadamitzky M, Hausleiter J, Shaw LJ, Kaufmann PA, Cury RC, Feuchtnner G, Kim YJ, Maffei E, Raff G, Pontone G, Andreini D, Chang HJ, Min JK, Leipsic J. Long term prognostic utility of coronary CT angiography in patients with no modifiable coronary artery disease risk factors: results from the 5 year follow-up of the CONFIRM International Multicenter Registry. *J Cardiovasc Comput Tomogr* 2016;**10**:22–27.
121. Nielsen LH, Botker HE, Sorensen HT, Schmidt M, Pedersen L, Sand NP, Jensen JM, Steffensen FH, Tilsted HH, Bottcher M, Diederichsen A, Lambrechtsen J, Kristensen LD, Ovrehus KA, Mickley H, Munkholm H, Gotzsche O, Husain M, Knudsen LL, Norgaard BL. Prognostic assessment of stable coronary artery

- disease as determined by coronary computed tomography angiography: a Danish multicentre cohort study. *Eur Heart J* 2017;**38**:413–421.
122. Chow BJ, Small G, Yam Y, Chen L, McPherson R, Achenbach S, Al-Mallah M, Berman DS, Budoff MJ, Cademartiri F, Callister TQ, Chang HJ, Cheng YV, Chinnaiyan K, Cury R, Delago A, Dunning A, Feuchtnr G, Hadamitzky M, Hausleiter J, Karlsberg RP, Kaufmann PA, Kim YJ, Leipsic J, LaBounty T, Lin F, Maffei E, Raff GL, Shaw LJ, Villines TC, Min JK; CONFIRM Investigators. Prognostic and therapeutic implications of statin and aspirin therapy in individuals with nonobstructive coronary artery disease: results from the CONFIRM (COronary CT Angiography Evaluation For Clinical Outcomes: An International Multicenter registry) registry. *Arterioscler Thromb Vasc Biol* 2015;**35**:981–989.
  123. Pazhenkottil AP, Nkoulou RN, Ghadri JR, Herzog BA, Buechel RR, Kuest SM, Wolfrum M, Fiechter M, Husmann L, Gaemperli O, Kaufmann PA. Prognostic value of cardiac hybrid imaging integrating single-photon emission computed tomography with coronary computed tomography angiography. *Eur Heart J* 2011;**32**:1465–1471.
  124. Maaniitty T, Stenstrom I, Bax JJ, Uusitalo V, Ukkonen H, Kajander S, Maki M, Saraste A, Knuuti J. Prognostic value of coronary CT angiography with selective PET perfusion imaging in coronary artery disease. *JACC Cardiovasc Imaging* 2017;**10**:1361–1370.
  125. Mock MB, Ringqvist I, Fisher LD, Davis KB, Chaitman BR, Kouchoukos NT, Kaiser GC, Alderman E, Ryan TJ, Russell RO Jr, Mullin S, Fray D, Killip T III. Survival of medically treated patients in the coronary artery surgery study (CASS) registry. *Circulation* 1982;**66**:562–568.
  126. Hammermeister KE, DeRouen TA, Dodge HT. Variables predictive of survival in patients with coronary disease. Selection by univariate and multivariate analyses from the clinical, electrocardiographic, exercise, arteriographic, and quantitative angiographic evaluations. *Circulation* 1979;**59**:421–430.
  127. Mark DB, Nelson CL, Califf RM, Harrell FE Jr, Lee KL, Jones RH, Fortin DF, Stack RS, Glower DD, Smith LR, et al. Continuing evolution of therapy for coronary artery disease. Initial results from the era of coronary angioplasty. *Circulation* 1994;**89**:2015–2025.
  128. Tonino PA, Fearon WF, De Bruyne B, Oldroyd KG, Leesar MA, Ver Lee PN, Maccarthy PA, Van't Veer M, Pijls NH. Angiographic versus functional severity of coronary artery stenoses in the FAME study fractional flow reserve versus angiography in multivessel evaluation. *J Am Coll Cardiol* 2010;**55**:2816–2821.
  129. Johnson NP, Toth GG, Lai D, Zhu H, Acar G, Agostoni P, Appelman Y, Arslan F, Barbato E, Chen SL, Di Serafino L, Dominguez-Franco AJ, Dupouy P, Esen AM, Esen OB, Hamilos M, Iwasaki K, Jensen LO, Jimenez-Navarro MF, Katritsis DG, Kocaman SA, Koo BK, Lopez-Palop R, Lorin JD, Miller LH, Muller O, Nam CW, Oud N, Puymirat E, Rieber J, Rioufol G, Rodes-Cabau J, Sedlis SP, Takeishi Y, Tonino PA, Van Belle E, Verna E, Werner GS, Fearon WF, Pijls NH, De Bruyne B, Gould KL. Prognostic value of fractional flow reserve: linking physiological severity to clinical outcomes. *J Am Coll Cardiol* 2014;**64**:1641–1654.
  130. Barbato E, Toth GG, Johnson NP, Pijls NH, Fearon WF, Tonino PA, Curzen N, Piroth Z, Rioufol G, Juni P, De Bruyne B. A prospective natural history study of coronary atherosclerosis using fractional flow reserve. *J Am Coll Cardiol* 2016;**68**:2247–2255.
  131. Park SJ, Ahn JM, Kang SJ, Yoon SH, Koo BK, Lee JY, Kim WJ, Park DW, Lee SW, Kim YH, Lee CW, Park SW. Intravascular ultrasound-derived minimal lumen area criteria for functionally significant left main coronary artery stenosis. *JACC Cardiovasc Interv* 2014;**7**:868–874.
  132. D'Ascenzo F, Barbero U, Cerrato E, Lipinski MJ, Omede P, Montefusco A, Taha S, Naganuma T, Reith S, Voros S, Latib A, Gonzalo N, Quadri G, Colombo A, Biondi-Zoccai G, Escaned J, Moretti C, Gaita F. Accuracy of intravascular ultrasound and optical coherence tomography in identifying functionally significant coronary stenosis according to vessel diameter: a meta-analysis of 2,581 patients and 2,807 lesions. *Am Heart J* 2015;**169**:663–673.
  133. Stone GW, Maehara A, Lansky AJ, de Bruyne B, Cristea E, Mintz GS, Mehran R, McPherson J, Farhat N, Marso SP, Parise H, Templin B, White R, Zhang Z, Serruys PW; PROSPECT Investigators. A prospective natural-history study of coronary atherosclerosis. *N Engl J Med* 2011;**364**:226–235.
  134. Boden WE, O'Rourke RA, Teo KK, Hartigan PM, Maron DJ, Kostuk WJ, Knudtson M, Dada M, Casperson P, Harris CL, Chaitman BR, Shaw L, Gosselin G, Nawaz S, Title LM, Gau G, Blaustein AS, Booth DC, Bates ER, Spertus JA, Berman DS, Mancini GB, Weintraub WS; COURAGE Trial Research Group. Optimal medical therapy with or without PCI for stable coronary disease. *N Engl J Med* 2007;**356**:1503–1516.
  135. BARI 2D Study Group, Frye RL, August P, Brooks MM, Hardison RM, Kelsey SF, MacGregor JM, Orchard TJ, Chaitman BR, Genuth SM, Goldberg SH, Hlatky MA, Jones TL, Molitch ME, Nesto RW, Sako EY, Sobel BE. A randomized trial of therapies for type 2 diabetes and coronary artery disease. *N Engl J Med* 2009;**360**:2503–2515.
  136. Al-Lamee R, Thompson D, Dehbi HM, Sen S, Tang K, Davies J, Keeble T, Mielewicz M, Kaprielian R, Malik IS, Nijjer SS, Petraco R, Cook C, Ahmad Y, Howard J, Baker C, Sharp A, Gerber R, Talwar S, Assomull R, Mayet J, Wensel R, Collier D, Shun-Shin M, Thom SA, Davies JE, Francis DP; ORBITA investigators. Percutaneous coronary intervention in stable angina (ORBITA): a double-blind, randomised controlled trial. *Lancet* 2018;**391**:31–40.
  137. Oh PC, Kang WC, Moon J, Park YM, Kim S, Kim MG, Lee K, Ahn T, Shin EK. Anti-anginal and metabolic effects of carvedilol and atenolol in patients with stable angina pectoris: a prospective, randomized, parallel, open-label study. *Am J Cardiovasc Drugs* 2016;**16**:221–228.
  138. Rousan TA, Mathew ST, Thadani U. Drug therapy for stable angina pectoris. *Drugs* 2017;**77**:265–284.
  139. Nossaman VE, Nossaman BD, Kadowitz PJ. Nitrates and nitrites in the treatment of ischemic cardiac disease. *Cardiol Rev* 2010;**18**:190–197.
  140. Tardif JC, Ford I, Tendera M, Bourassa MG, Fox K; INITIATIVE Investigators. Efficacy of ivabradine, a new selective I(f) inhibitor, compared with atenolol in patients with chronic stable angina. *Eur Heart J* 2005;**26**:2529–2536.
  141. Salazar CA, Basilio Flores JE, Veramendi Espinoza LE, Mejia Dolores JW, Rey Rodriguez DE, Loza Munarriz C. Ranolazine for stable angina pectoris. *Cochrane Database Syst Rev* 2017;**2**:CD011747.
  142. Savarese G, Rosano G, D'Amore C, Musella F, Della Ratta GL, Pellegrino AM, Formisano T, Vitagliano A, Cirillo A, Cice G, Fimiani L, del Guercio L, Trimarco B, Perrone-Filardi P. Effects of ranolazine in symptomatic patients with stable coronary artery disease. A systematic review and meta-analysis. *Int J Cardiol* 2013;**169**:262–270.
  143. Fragasso G, Piatti Md PM, Monti L, Palloschi A, Setola E, Puccetti P, Calori G, Lopaschuk GD, Margonato A. Short- and long-term beneficial effects of trimetazidine in patients with diabetes and ischemic cardiomyopathy. *Am Heart J* 2003;**146**:E18.
  144. Meiszterics Z, Konyi A, Hild G, Sarszegi Z, Gaszner B. Effectiveness and safety of anti-ischemic trimetazidine in patients with stable angina pectoris and Type 2 diabetes. *J Comp Eff Res* 2017;**6**:649–657.
  145. Husted SE, Ohman EM. Pharmacological and emerging therapies in the treatment of chronic angina. *Lancet* 2015;**386**:691–701.
  146. Tarkin JM, Kaski JC. Vasodilator therapy: nitrates and nicorandil. *Cardiovasc Drugs Ther* 2016;**30**:367–378.
  147. Pascual I, Moris C, Avanzas P. Beta-blockers and calcium channel blockers: first line agents. *Cardiovasc Drugs Ther* 2016;**30**:357–365.
  148. Poirier L, Tobe SW. Contemporary use of beta-blockers: clinical relevance of subclassification. *Can J Cardiol* 2014;**30**:S9–S15.
  149. European Medicines Agency. European Medicines Agency recommends measures to reduce risk of heart problems with Corlentor/Procoralan (ivabradine). <https://www.ema.europa.eu/en/news/european-medicines-agency-recommends-measures-reduce-risk-heart-problems-corlentorprocoralan> (accessed date here).
  150. Koruth JS, Lala A, Pinney S, Reddy VY, Dukkipati SR. The clinical use of ivabradine. *J Am Coll Cardiol* 2017;**70**:1777–1784.
  151. European Medicines Agency. Assessment report. Pursuant to Article 30 of Directive 2001/83/EC. Ikorel and associated names; Dancor and associated names. INN of the active substance: nicorandil. [https://www.ema.europa.eu/en/documents/referral/ikorel-dancor-article-30-referral-assessment-report\\_en.pdf](https://www.ema.europa.eu/en/documents/referral/ikorel-dancor-article-30-referral-assessment-report_en.pdf) (accessed date here).
  152. McCarthy CP, Mullins KV, Kerins DM. The role of trimetazidine in cardiovascular disease: beyond an anti-anginal agent. *Eur Heart J Cardiovasc Pharmacother* 2016;**2**:266–272.
  153. European Medicines Agency. Assessment Report for trimetazidine containing medicinal products. [https://www.ema.europa.eu/en/documents/referral/trimetazidine-article-31-referral-assessment-report\\_en.pdf](https://www.ema.europa.eu/en/documents/referral/trimetazidine-article-31-referral-assessment-report_en.pdf) (accessed date here).
  154. European Medicines Agency. Summary of product characteristics. Ranexa 375 mg prolonged-release tablets. [https://www.ema.europa.eu/en/documents/product-information/ranexa-epar-product-information\\_en.pdf](https://www.ema.europa.eu/en/documents/product-information/ranexa-epar-product-information_en.pdf) (accessed date here).
  155. Thurston MM, Phillips BB, Bourg CA. Safety and efficacy of allopurinol in chronic kidney disease. *Ann Pharmacother* 2013;**47**:1507–1516.
  156. Day RO, Graham GG, Hicks M, McLachlan AJ, Stocker SL, Williams KM. Clinical pharmacokinetics and pharmacodynamics of allopurinol and oxypurinol. *Clin Pharmacokinet* 2007;**46**:623–644.
  157. Costa F, van Klaveren D, James S, Heg D, Raber L, Feres F, Pilgrim T, Hong MK, Kim HS, Colombo A, Steg PG, Zanchin T, Palmerini T, Wallentin L, Bhatt DL, Stone GW, Windecker S, Steyerberg EW, Valgimigli M; PRECISE-DAPT Study Investigators. Derivation and validation of the predicting bleeding complications in patients undergoing stent implantation and subsequent dual antiplatelet therapy (PRECISE-DAPT) score: a pooled analysis of individual-patient datasets from clinical trials. *Lancet* 2017;**389**:1025–1034.
